23 **Abstract**

24 Atmospheric Particulate Matter (PM) is one of the leading environmental risk factors for the  
25 global burden of disease. Increasing epidemiological studies demonstrated that PM plays a  
26 significant role in CNS demyelinating disorders; however, there is no direct testimony of this,  
27 and yet the molecular mechanism by which the occurrence remains unclear. Using multiple *in*  
28 *vivo* and *in vitro* strategies, in the present study we demonstrate that PM exposure aggravates  
29 neuroinflammation, myelin injury, and dysfunction of movement coordination ability via  
30 boosting microglial pro-inflammatory activities, in both the pathological demyelination and  
31 physiological myelinogenesis animal models. Indeed, pharmacological disturbance combined  
32 with RNA-seq and ChIP-seq suggests that TLR-4/NF- $\kappa$ B signaling mediated a core network  
33 of genes that control PM-triggered microglia pathogenicity. In summary, our study defines a  
34 novel atmospheric environmental mechanism that mediates PM-aggravated microglia  
35 pathogenic activities, and establishes a systematic approach for the investigation of the effects  
36 of environmental exposure in neurologic disorders.

37

38 **Significance**

39 An atmospheric trigger, the respirable particulate matter boost microglia pathogenic  
40 activities in the context of CNS demyelination by activating TLR-4/NF- $\kappa$ B signaling  
41 axis in animal models of immune- and toxicity-induced demyelination, as well as  
42 myelinogenesis during postnatal development.

43

44 **Key Words:** Particulate Matter (PM), CNS demyelination, Microglia, TLR-4/NF- $\kappa$ B

45 signaling

46

## 47 **Introduction**

48 Air pollution has become the prominent environmental risk factor that affects public  
49 health (Caplin et al. 2019). Among its heterogeneous composition, atmospheric  
50 particulate matter (PM) appears to be one of the most harmful components contribute  
51 to the pathogenesis of diseases (Babadjouni et al. 2017; Wu et al. 2018). Although a  
52 majority of PM research focuses on the respiratory and cardiovascular diseases,  
53 increasing epidemiological evidence has linked the irreversible adverse roles of  
54 continuous PM exposure with the morbidity and mortality of central nervous system  
55 (CNS) diseases (Boda et al. 2020; de Prado Bert et al. 2018; Younan et al. 2020).

56 Studies have confirmed that nanosized PM can physically penetrate the  
57 blood-brain barrier and placental barrier, and therefore invade the brain parenchyma  
58 of adults and fetuses to directly induce effects in the brain (Bové et al. 2019; Maher et  
59 al. 2016). In 2018, the editorial of *The Lancet Neurology* reported that air pollution  
60 has been associated with increased risk of neurological disorders (The Lancet 2018).  
61 Growing epidemiological reports have indisputably demonstrated that long-time PM  
62 exposure affects the development of the nervous system, thus increases the incidence  
63 and/or severity of Alzheimer's disease (AD), stroke, brain atrophy, anxiety, and  
64 multiple sclerosis (MS), among others (Babadjouni et al. 2017; Boda et al. 2020; de  
65 Prado Bert et al. 2018; Khan et al. 2019; Younan et al. 2020). In addition, due to the  
66 specific physiology of fetuses (relatively high ratio of respiration rate to body size and

67 underdeveloped lung), PM exposure during pregnancy or early pregnancy causes  
68 long-term and irreversible adverse effects on neurodevelopment of fetus  
69 (Chandrakumar and t Jong 2019; Sripada 2017). However, the pathogenic mechanism  
70 of PM leading to different/specific neurological diseases needs to be elucidated in  
71 depth.

72 Myelin sheaths represent key structures for saltatory conduction of nerve impulse  
73 and trophic support of axons, and their loss or dysfunction leads to demyelination and  
74 impaired neurological function (Hughes and Appel 2020). Clinically, demyelination  
75 occurs in a range of human neurological disorders as diverse as MS, optic  
76 neuromyelitis, leukodystrophy, spinal cord injury, AD, Parkinson's disease (PD),  
77 white matter stroke, as well as schizophrenia (Goldman and Kuypers 2015; Goldman  
78 et al. 2012; Malpass 2012; Marin and Carmichael 2019; Mitew et al. 2010; Pukos et al.  
79 2019). The exact etiology and pathogenesis of demyelination diseases are unknown so  
80 far, involving many complex factors such as environment exposures, autoimmune  
81 response, and genetic susceptibility (Kumar and Abboud 2019). Klocke et al. found  
82 that exposure to concentrated fine and ultrafine particles during embryonic  
83 development affected oligodendrocyte maturation and brain myelination in adulthood  
84 (Klocke et al. 2017). Taking MS, a representative inflammatory demyelination disease,  
85 as an example, epidemiologic evidence highlights the effect of PM exposure on the  
86 risk of incidence, relapse, and deterioration of MS (Bai et al. 2018; Tateo et al. 2019;  
87 Zhao et al. 2019), suggesting strong correlations connecting PM exposure to  
88 demyelination and remyelination failure. However, the direct evidence of PM action

89 on demyelinating disease is lack, and the cellular/molecular mechanisms leading to  
90 this disease process remain unclear.

91 To investigate this important question, here we develop the complementary  
92 pathological and physiological demyelination/myelination models to identify PM that  
93 boost microglia-driven neuroinflammation, and define the TLR-4/NF- $\kappa$ B signaling  
94 pathways involved in the regulation of microglia pro-inflammatory activities as well  
95 as PM-related demyelinating diseases.

96

## 97 **Methods**

### 98 **Material and Methods**

#### 99 *Mice*

100 C57BL/6 mice (8-10 weeks of age) were purchased from the Fourth Military University  
101 (Xi'an, China). All experimental procedures and protocols of mice were approved by the  
102 Committee on the Ethics of Animal Experiments of Shaanxi Normal University (No.  
103 ECES-2015-0247) and were carried out in accordance with the approved institutional  
104 guidelines and regulations.

105

#### 106 *Particulate matter (PM) sample preparation*

107 The PM standard reference materials (SRMs) 1648a were obtained from the National  
108 Institute of Standards and Technology (NIST) (Gaithersburg, MD). Dispersed suspensions  
109 of SRM1648a were created by sonication in sterile phosphate buffered saline (PBS) for 15  
110 min in a cooling water bath. SRM1648a PM was used at 10 mg/mL PM per dose for *in*

111 *vivo* experiments or used at 100 µg/mL PM at the highest concentration *in vitro*.

112

### 113 ***Animal treatment***

114 Considering the actual population exposure dose and the previous study (Ku et al. 2017),  
115 we chose the administration dose of 5.0 mg/kg/d PM exposure in mice. According to  
116 Ambient air quality standards of China (GB3095-2012), the amount of Grade II PM at  
117 0.15 mg/m<sup>3</sup>/d is 0.04 mg. It is reported that the respiratory volume of the mice was 90  
118 mL/min and the respiratory volume was ~0.26 m<sup>3</sup>. Thus, the PM exposure dose in mice is  
119 ~2.0 mg/kg/d. In our study, the PM dose used was 5.0 mg/kg/d, which was 2.5-fold higher  
120 than that in Grade II PM in China but still in the range of the reported maximum PM  
121 levels (Xia et al. 2020).

122

### 123 ***EAE induction and PM treatment***

124 Female, 8-10 week-old C57BL/6 mice were immunized with MOG<sub>35-55</sub> and pre-treated  
125 with PBS or PM (nasopharyngeal inhalation, 5.0 mg/kg/d) daily, starting at day -30 before  
126 immunization until 30 p.i. Mice were immunized at 2 sites on the back with 200 µg of  
127 myelin oligodendrocyte glycoprotein peptide 35-55 (MOG<sub>35-55</sub>) (Genescript, Piscataway,  
128 NJ) in 200 µl of emulsion containing 50% complete Freund's adjuvant with 5 mg/ml  
129 heat-killed *Mycobacterium tuberculosis* H37Ra (Difco, Lawrence, KS). All mice were  
130 intraperitoneally (i.p.) injected with 200 ng pertussis toxin (Sigma-Aldrich, St. Louis, MO)  
131 in PBS on days 0 and 2 p.i. Clinical EAE was scored daily in a blind manner, according to  
132 a 0-5 scale as described previously (Yang et al. 2009): 0, no clinical signs; 0.5, stiff tail; 1,

133 limp tail; 1.5, limp tail and waddling gait; 2, paralysis of one limb; 2.5, paralysis of one  
134 limb and weakness of another limb; 3, complete paralysis of both hind limbs; 4, moribund;  
135 and 5, death. EAE mice were randomly enrolled in the following treatment groups: 1)  
136 Sham-treated PBS control group: EAE mice were exposed intranasally to 20  $\mu$ L PBS; 2)  
137 PM-treated group: EAE mice were exposed to 10.0 mg/mL PM in a total of 20  $\mu$ L PBS  
138 per dose. The mice were dosed with 20  $\mu$ L of PM or PBS treatment 3 times starting at day  
139 -30 days until day 30 after induction. Mice were anesthetized and perfused with 4% PFA;  
140 brains and spinal cords were removed for histopathological, immunohistochemistry,  
141 electron microscopy, Q-PCR, FACS, and ELISA analyses.

142

#### 143 ***Cuprizone-induced demyelination and PM treatment***

144 For the cuprizone model, 8-week-old male C57BL/6 mice were fed the standard rodent  
145 diet containing 0.2% copper chelator cuprizone (CPZ) for 4 week, which causes CNS  
146 demyelination. For induced remyelination experiments, mice were fed cuprizone for 4  
147 weeks to achieve complete demyelination of the corpus callosum, after which cuprizone  
148 was withdrawn and mice were again fed normal chow, allowing for spontaneous  
149 remyelination occurring within the next 2 weeks. PM (5.0 mg/kg/d) or PBS was  
150 nasopharyngeal inhaled daily from -4 week to 6 week. Mice were anesthetized and  
151 perfused with 4% PFA; brains were removed for histopathological, immunohistochemistry,  
152 electron microscopy, and Q-PCR analyses.

153

#### 154 ***PM exposure of pregnant mice and their offspring***

155 In order to model a maternal PM exposure, pregnant mice were pre-treated with PBS or  
156 PM (nasopharyngeal inhalation, 5.0 mg/kg/d) daily until parturition. Pups from PBS- or  
157 PM-treated group with similar weights were subsequently exposed to PBS or PM at  
158 postnatal Days 4-21. Brain was harvested for Q-PCR, immunohistochemistry, and TEM  
159 analysis at postnatal Days 14, and behavioral evaluation was processed at postnatal days  
160 20-22.

161

### 162 ***Behavioral experiments***

163 In order to evaluate the motor balance and motor coordination of mice, beam walking test,  
164 rota-rod test, and wire hang test were done at the postnatal 19<sup>th</sup>, 20<sup>th</sup> and 21<sup>th</sup> day,  
165 respectively. Beaming walking test and wire hang test have been done between 8a.m. to  
166 12a.m, and rota-rod test has been completed between 2p.m to 6p.m. After each trail, all  
167 devices were wiped clean with 75% alcohol to prevent interference with the next trail.

168 For beam walking test (Skripuletz et al. 2015; Skripuletz et al. 2010), each mouse  
169 was placed on the end of a 100 cm long steel beam with 10 mm wide (placed horizontally  
170 60 cm above a foam cushion). The one end of beam mounted on a support and the other  
171 attached to the rat cage which mice could escape into. Mice received two trials which  
172 each trial interval 60s and the latency to traverse the beam was recorded for each trial  
173 (cut-off time 60 s). In the results, the mean score of the two trials is given.

174 In the rotarod test (Scoles et al. 2017), mouse was put to the rotarod with a speed of  
175 5 rpm for 5min one day in advance to adapt to the rotarod. In the formal trial, mice were  
176 placed on the rotarod which has an initial speed of 5 rpm and accelerates at an increase of



177 1 rpm per second. The latency that the mouse stuck before they fell was recorded. Mice  
178 received two trials which each trial interval 60s, and the mean score of the two trials is  
179 given in the final results.

180 For Wire hang test (Shao et al. 2019), each mouse was placed on a cotton rope (50cm  
181 long, 2mm diameter) that connected to two 60cm high platforms. A foam cushion was  
182 placed just below the rope to prevent mice from injuring. Each mouse was put in the  
183 middle of the rope and the latency to reach one of the platforms was recorded (cut-off  
184 time 60 s). Mice received two trials which each trial interval 60s, and the mean score of  
185 the two trials is given in the final results.

186

### 187 *Histological analysis*

188 Lumbar spinal cords or brains were harvested for pathological assessment. CNS  
189 tissues were cut into 7  $\mu$ m sections, fixed with 4% paraformaldehyde, and stained with  
190 hematoxylin and eosin (H&E) for assessment of inflammation, and with Luxol fast blue  
191 (LFB) for demyelination. Slides were assessed and scored in a blinded fashion for  
192 inflammation (Yang et al. 2009): 0, none; 1, a few inflammatory cells; 2, organization of  
193 perivascular infiltrates; and 3, abundant perivascular cuffing with extension into the  
194 adjacent tissue. For demyelination quantification, total white matter was manually  
195 outlined, and area (%) of demyelination was calculated using Image-Pro Plus software.

196

### 197 *Electron microscopy*

198 Mice were deeply anesthetized and perfused with 4% PFA, 1.5% glutaraldehyde and 1

199 mM CaCl<sub>2</sub> in 0.1 M cacodylate buffer. Brain or section of ventral spinal cords was  
200 harvested and fixed in the same solution at 4°C for 24 h. Samples were washed, post-fixed  
201 with 1% OsO<sub>4</sub> in 0.1 M PBS (pH 7.4) for 2 h at room temperature, and subsequently  
202 dehydrated in graded ethanol series. Embedding was performed in TAAB resin. Sections,  
203 1.0 µm thick, were cut, stained in toluidine blue (1%), and examined by light microscopy  
204 (E800, Nikon) for general histological assessment. Ultrathin sections (60-80 nm) were cut,  
205 viewed and photographed with a HT7700 (Hitachi) transmission electron microscope  
206 operated at 120 kV. Images were analyzed in Image-Pro for thickness of myelin sheath  
207 and g-ratio.

208

### 209 *Immunofluorescence*

210 For immunohistochemistry, spinal cord or brain tissues were fixed using 4%  
211 paraformaldehyde for 1 day and then cryo-protected using a 30% sucrose solution for 3  
212 days. Fixed tissues were embedded in OCT compound (Tissue-Tek, Sakura Finetek, Japan)  
213 for frozen sections and then sectioned coronally at 12 µm thickness. Transverse sections  
214 of brain and spinal cord were cut, and immunohistochemistry was performed using  
215 different Abs following established procedures.

216 For immunocytochemical staining, microglia medium were fixed with 4%  
217 paraformaldehyde for 30 min at room temperature and washed twice with PBS. Cells  
218 were permeabilized with 0.3% Triton X-100 (in PBS) for 5 min at room temperature and  
219 washed twice with PBS. Sections were incubated with 10% goat serum in PBS for 30-60  
220 min; primary Abs were then added and incubated at 4°C overnight. Primary Abs were

221 washed out with PBS 3 times after overnight incubation. Sections were then incubated  
222 with species-specific secondary Abs for 60 min at room temperature, followed by washing  
223 with PBS 3 times. Immunofluorescence controls were routinely prepared by omitting  
224 primary Abs. Nuclei were stained with DAPI. Slides were covered with mounting  
225 medium (Vector Laboratories, Burlingame, CA, USA).

226 Primary Abs used for these studies were specific for: myelin basic protein (MBP,  
227 Abcam), CD45 (Abcam), A2B5 (Abcam), glial fibrillary acid protein (GFAP, Abcam),  
228 A2B5 (Millipore), adenomatous polyposis coli/CC1 (Millipore), and IBA1 (Abcam).  
229 FluoroMyelin staining was order from Invitrogen. Appropriate fluorescent secondary Abs  
230 were used (Alexa Fluor, Invitrogen).

231

### 232 *Image Analysis*

233 Images were captured by fluorescent microscopy (Nikon Eclipse E600; Nikon,  
234 Melville, NY) or confocal microscopy (Zeiss LSM 510; Carl Zeiss, Thornwood, NY).  
235 Approximately 8-10 images were captured per slice to cover most of the total area of the  
236 slice (excluding the edges), thus removing any bias or variations in image acquisition.  
237 Five slices were quantified per treatment/control and the experiment was repeated three  
238 times using cultures from different mice. Image acquisition settings were kept the same  
239 across different treatments. Myelinated axons were quantified by confocal microscopy as  
240 described previously (Huang et al. 2011). The intensity of MBP and FluoroMyelin  
241 immunostaining, and cell numbers of CD45, IBA1, or GFAP per field was determined  
242 using ImagePro software (Media Cybernetics). The numbers of CD45, IBA1, or GFAP

243 positive cells were counted in a blinded fashion either from representative  $\times 20$  or  $\times 40$   
244 objective images or a series of images derived from Z-stack imaging.

245

#### 246 ***Preparation of infiltrating MNCs from the CNS***

247 To acquire CNS MNCs, spinal cords and brains were mechanically dissociated and  
248 incubated with Liberase (Roche, Nutley, NJ) for 30 min, passed through a 70  $\mu\text{m}$  cell  
249 strainer and washed with cold PBS. Cells were then fractionated on a 70/30% Percoll  
250 (Sigma-Aldrich) gradient by centrifugation at 2000 rpm for 20 min and MNCs were  
251 collected from the interface and washed with PBS.

252

#### 253 ***Cytokine measurement by ELISA***

254 Spleen was mechanically dissociated through a 70  $\mu\text{m}$  cell strainer (Falcon,  
255 Tewksbury, MA) and incubated with red blood cell lysis buffer (Miltenyi)  $\sim 2$  min.  
256 Harvested cells were washed with cold PBS before *in vitro* stimulation. Splenocytes at  $1.0$   
257  $\times 10^6$  cells/ml were cultured in triplicates in RPMI 1640 supplemented with 10% FBS in  
258 24-well plates and stimulated with 25  $\mu\text{g/ml}$  MOG<sub>35-55</sub> for 72 h. Supernatants were  
259 collected and assayed for IL-6 and TNF- $\alpha$  by ELISA Kits (R&D Systems, Minneapolis,  
260 MN).

261

#### 262 ***Flow cytometry***

263 For surface-marker staining, cells were incubated with fluorochrome-conjugated Abs  
264 to CD45, CD4, CD8, CD11b, CD11c, CD80, CD86, and MHC II (BD Biosciences, San

265 Jose, CA) at the recommended dilution or isotype control Abs for 30 min on ice. To  
266 analyze MOG-specific Th cells, CNS-infiltrating MNCs were stimulated with 25 µg/ml  
267 MOG peptide overnight, followed by stimulation with 50 ng/ml PMA and 500 ng/ml  
268 ionomycin in the presence of GolgiPlug for 4 h. Cells were surface-stained with mAbs  
269 against CD4 and CD8. Cells were then washed, fixed, and permeabilized with Fix & Perm  
270 Medium (Invitrogen), and intracellular cytokines were stained with Abs against IL-17, or  
271 IFN-γ, IL-10 (BD Biosciences). Foxp3 staining was carried out using a commercial kit,  
272 according to the manufacturer's instructions (eBioscience, San Diego, CA). Flow  
273 cytometry analysis was performed on FACS Aria (BD Biosciences, San Jose, CA) and  
274 data were analyzed with FlowJo software (Treestar, Ashland, OR).

275

### 276 *Isolation of primary mouse microglia*

277 Primary microglia were isolated from newborn mouse brain (P3), by dissociation  
278 with Neural Tissue Dissociation Kit (Miltenyi Biotech Inc.) and purification with either  
279 anti-CD11b microbeads (Miltenyi Biotech Inc.). Microglia were cultured in DMEM/F12 +  
280 10% FBS, 5% HS, 2 mM Penicillin-Streptomycin, and 5 ng/mL M-CSF. Microglia were  
281 then either left unstimulated, stimulated with lipopolysaccharide (LPS) (100 ng/mL), or  
282 with 200 mg/mL PM. Cells were analyzed using flow cytometry, Q-PCR, western blotting,  
283 ELISA, and co-culture assay. To check the morphology of activated microglia, the cells  
284 were labeled with IBA1 and counterstained with DAPI.

285

### 286 *Western Blot Analysis*

287 Cells cultured under different treatments were washed with PBS and lysed by cell  
288 lysis buffer (Cell Signaling, Danvers, MA) supplemented with 1 mM  
289 phenylmethylsulfonyl fluoride and 1× proteinase inhibitor cocktail (Sigma, St. Louis,  
290 MO). Protein concentrations of all samples were determined using the Pierce BCA Protein  
291 Assay Kit (Thermo, Rockford, IL). Protein samples (equal amount/lane) were separated  
292 by 12% SDS-PAGE and transferred onto nitrocellulose membrane. The transformed  
293 membrane was blocked for 2 h followed by incubation with primary antibodies at 4°C  
294 overnight. The membrane was washed three times with TBST buffer (50 mM Tris·HCl,  
295 pH 7.4, 150 mM NaCl, 0.1% Tween 20) for 5 min each and then incubated with 1:200  
296 diluted anti-rabbit or mouse IgG-horseradish peroxidase (HRP) (Thermo Scientific,  
297 Rockford, IL) at room temperature for 1 h. The protein band was detected using Super  
298 Signal West Pico Chemiluminescent Substrate (Thermo Scientific, Rockford, IL).

299

### 300 *Q-PCR*

301 Total RNA was extracted from spinal cords using RNeasy® Plus Mini Kit (QIAGEN,  
302 Valencia, CA) according to the manufacturer's instructions. Reverse transcription was  
303 conducted using QuantiTect® Reverse Transcription Kit (Qiagen,). Real-time PCR was  
304 performed using the Custom RT<sup>2</sup> Profiler PCR Array according to the manufacturer's  
305 instructions (Qiagen), and detection was performed using the ABI Prism® 7500 Sequence  
306 Detection System (Applied Biosystems, Foster City, CA). All data were normalized to an  
307 average of five housekeeping genes Gusb, Hprt, Hsp90ab1, Gapdh and Actb. Qiagen's  
308 online web analysis tool was utilized and gene relative expression was calculated by log<sub>2</sub>

309 of  $-\Delta\Delta C_t$  values from triplicate of PCR. More than two fold changes ( $\log_2 < -1$  or  $\log_2 >$   
310 1) were considered significant between groups.

311

### 312 *RNA-seq and data analysis*

313 RNA from PBS- or PM-treated microglia were prepared using RNAPrep pure Cell /  
314 Bacteria Kit (Cat. #dp430). RNA degradation and contamination was monitored on 1%  
315 agarose gels. RNA purity was checked using the NanoPhotometer spectrophotometer  
316 (IMPLEN, CA, USA). RNA concentration was measured using Qubit RNA Assay Kit in  
317 Qubit® 2.0 Fluorometer (Life Technologies, CA, USA). RNA integrity was assessed using  
318 the RNA Nano 6000 Assay Kit of the Bioanalyzer 2100 system (Agilent Technologies,  
319 CA, USA). A total amount of 3  $\mu\text{g}$  RNA per sample was used as input material for the  
320 RNA sample preparations. Sequencing libraries were generated using NEBNext Ultra™  
321 RNA Library Prep Kit for Illumina (NEB, USA) following manufacturer's  
322 recommendations and index codes were added to attribute sequences to each sample. The  
323 clustering of the index-coded samples was performed on a cBot Cluster Generation  
324 System using TruSeq PE Cluster Kit v3-cBot-HS (Illumina) according to the  
325 manufacturer's instructions. After cluster generation, the library preparations were  
326 sequenced on an Illumina HiSeq platform and 150 bp paired-end reads were generated.  
327 Raw data (raw reads) of fastq format were firstly processed through in-house perl scripts.  
328 In this step, clean data (clean reads) were obtained by removing reads containing adapter,  
329 reads containing poly-N and low quality reads from raw data. At the same time, Q20, Q30  
330 and GC content the clean data were calculated. All the downstream analyses were based

331 on the clean data with high quality. STAR is used to align clean reads to reference genome.  
332 STAR outperforms other aligners by a factor of >50 in mapping speed, while at the same  
333 time improving alignment sensitivity and precision. In addition to unbiased de novo  
334 detection of canonical junctions, STAR can discover non-canonical splices and chimeric  
335 (fusion) transcripts, and is also capable of mapping full-length RNA sequences. HTSeq  
336 v0.6.0 was used to count the reads numbers mapped to each gene. And then FPKM of  
337 each gene was calculated based on the length of the gene and reads count mapped to this  
338 gene. FPKM, expected number of Fragments Per Kilobase of transcript sequence per  
339 Millions base pairs sequenced, considers the effect of sequencing depth and gene length  
340 for the reads count at the same time, and is currently the most commonly used method for  
341 estimating gene expression levels. We applied DESeq2 algorithm to filter the  
342 differentially expressed genes, and DEGs were defined as genes with FDR less than 0.001  
343 and fold change larger than 2. GO Analysis: Gene ontology (GO) analysis was performed  
344 to facilitate elucidating the biological implications of unique genes in the significant or  
345 representative profiles of the differentially expressed gene in the experiment. We  
346 downloaded the GO annotations from NCBI (<http://www.ncbi.nlm.nih.gov/>), UniProt  
347 (<http://www.uniprot.org/>) and the Gene Ontology (<http://www.geneontology.org/>).  
348 Fisher's exact test was applied to identify the significant GO categories and FDR was  
349 used to correct the p-values. Pathway analysis was used to find out the significant  
350 pathway of the differential genes according to KEGG database. We turn to the Fisher's  
351 exact test to select the significant pathway, and the threshold of significance was defined  
352 by P-value and FDR.



353

354 *ChIP-seq and data analysis*

355 Approximately 1.2 million microglia were exposed to the indicated treatments  
356 followed by cell preparation according to the SimpleChIP® Enzymatic Chromatin IP  
357 Kit (Cell Signaling Technology, #9003). Samples were cross-linked for 10 min at  
358 room temperature with 1% formaldehyde solution, followed by 5 min of quenching  
359 with 125 mM glycine. Then washed twice with cold PBS, and the supernatant was  
360 aspirated. Nuclei were fragmented with a Misonix Sonicator 3000. Sonicated lysates  
361 were cleared once by centrifugation and incubated overnight at 4°C with magnetic  
362 beads bound with NFκB antibody (Cell Signaling Technology, Cat. No. 8242s) to  
363 enrich for DNA fragments. For the preparation of the magnetic beads bound with  
364 NFκB antibody, 70ul of Protein G Dynabeads (Life Technologies) was blocked with  
365 0.5% (w/v) BSA in PBS first, and then magnetic beads were bound with 10 μg  
366 anti-NFκB. After overnight incubation with the cleared sonicated lysates, magnetic  
367 beads were washed with RIPA buffer, 1M NH<sub>4</sub>HCO<sub>3</sub>. DNA was eluted in elution  
368 buffer. Cross-links were reversed overnight. Protein was digested using Proteinase K,  
369 and DNA was purified with HiPure Gel Pure DNA Mini Kit. Purified ChIP DNA was  
370 used to prepare Illumina multiplexed sequencing libraries. Libraries were prepared  
371 following the NEB/NEBNext® Library Quant Kit for Illumina®(E7630S). Amplified  
372 libraries were size-selected using a 2% gel to capture fragments between 200 and 500  
373 bp. Libraries were quantified by Agilent 2100. Libraries were sequenced on the  
374 Illumina NovaSeq6000.

375 For data analysis, Quality distribution plot and base content distribution were  
376 generated by FASTQC. Before read mapping, clean reads were obtained from the raw  
377 reads by removing the adaptor sequences. Paired-end ChIP-Seq reads were aligned  
378 using BWA mem (v.0.7.8) against the GRCm39/mm10 mouse genome assembly with  
379 default settings. PCR duplicates were not present in the dataset. Alignments were  
380 filtered with SAMtools (v1.3) to exclude reads with mapping quality < 30, not  
381 properly paired, aligned to mitochondrial genome, and aligned to ENCODE blacklist  
382 regions (ENCODE Project Consortium, 2012). For peak calling, MACS2 callpeak  
383 (v2.1.1) were called on individual replicates for each ChIP (treatment) and Input  
384 (control) pair, using q value < 0.05. The HOMER's findMotifsGenome.pl tool was  
385 used for Motif analysis. Peaks were annotated by the function of annotatePeak of  
386 ChIPseeker. Reads distributions (from bigwig) across gene are presented as an  
387 average plot (average of reads signals across the targeted genes). The deeptools tool is  
388 used for this analysis. Differential peaks were then selected with the absolute value of  
389 the log<sub>2</sub> fold change was 1 at an P value < 0.05 using DESeq2.

390

### 391 *Statistical analysis*

392 Statistical analyses were performed using GraphPad Prism 6 software (GraphPad, La Jolla,  
393 CA). Data are presented as mean ± SD. When comparing multiple groups, data were  
394 analyzed by analysis of variance (ANOVA) with Tukey's multiple comparisons test. A  
395 significance criterion of  $p < 0.05$  was used for all statistical analysis.

396

## 397 **Results**

### 398 **1. PM exposure aggravates myelin injury in EAE, a CNS inflammatory** 399 **demyelination model**

400 Neuroinflammation is one of the major pathogenic factors resulting in CNS injury. To  
401 assess the impact of PM aspiration on inflammation-induced demyelination *in vivo*,  
402 we first employed experimental autoimmune encephalomyelitis (EAE) model to  
403 recapitulate human demyelinating diseases based on immune response. Experimental  
404 design and treatment strategies are shown in [Figure 1A](#). We found that PM exposure  
405 (nasopharyngeal inhalation, 5.0 mg/kg/d) exacerbated EAE progression with an  
406 earlier onset compared with the PBS-treated control ([Figure 1B, C](#)). In PBS group, the  
407 average day of onset was day 12 post immunization (p.i.), while in PM-treated group  
408 disease onset began at ~day 8 p.i., deteriorated rapidly, and no recovery after reaching  
409 the peak ([Figure 1B](#)). The majority of EAE mice in PBS group displayed moderate  
410 signs (limp tail, waddling gait, or paralysis of one limb), while almost all PM-treated  
411 mice exhibited severe signs (complete paralysis of both hind limbs or moribund) at  
412 the end of observation ([Figure 1C](#)).

413 To evaluate the effect of PM on EAE-associated CNS pathology, we isolated  
414 thoracic spinal cord sections of EAE mice for histology and immunohistochemistry  
415 evaluation. Consistent with the clinical finding, histological analysis revealed  
416 significantly enhanced inflammatory and demyelinating foci in the white matter of the  
417 spinal cord ([Figure D](#)) in PM-treated animals when compared with the PBS control.  
418 PM-treated mice also had a remarkably increased number of mononuclear cells

419 (MNCs) in the CNS (**Figure 1E**). The total number of MNCs per mouse in the  
420 PM-treated group was  $13.9 \pm 1.1 \times 10^6$ , which is ~2.2-fold of that PBS control ( $6.24 \pm$   
421  $0.8 \times 10^6$ ,  $p < 0.001$ , **Figure 1E**). We then determined the effect of PM on myelin loss  
422 using anti-MBP (myelin marker) staining. As shown in **Figure 1F**, a significant degree  
423 of MBP loss (demyelination) had occurred in PM-treated mice, indicating disease  
424 progression. Furthermore, significantly accumulation of IBA1+ activated microglia  
425 (~2.5-fold in PM-treated EAE mice compared with PBS controls,  $p < 0.001$ ) and  
426 A2B5+ OPCs (~2.7-fold in PM-treated EAE mice compared with PBS controls,  $p <$   
427  $0.001$ ) in the area of demyelination injury were detected in PM-treated mice, while  
428 PM aspiration did not significantly impact the expression of the astrocyte marker  
429 GFAP (**Figure 1F**). To further evaluate the effects of PM treatment on the various  
430 inflammatory cells in CNS, isolated MNCs from CNS were analyzed by flow  
431 cytometry. The percentage and absolute number of CD45+CD11b+ cells (microglia  
432 and infiltrating macrophages) and other infiltrated immune cells (CD45+CD11b-  
433 cells) were increased obviously in PM group, compared with the PBS control (**Figure**  
434 **1G**). Increased expression of CD80 and MHCII was also observed in CD11b+ cells  
435 (microglia/infiltrating macrophages) and CD11c+ cells (dendritic cells; DCs) (**Figure**  
436 **1G**), indicating an enhanced activation of these cells. The total numbers of CD4+ and  
437 CD8+ T cells and percentages of Th17 (CD4+IL17+) and Th1 (CD4+IFN- $\gamma$ +) cells  
438 were also significantly increased under PM aspiration (all  $p < 0.05$ ; **Figure 1G**). To  
439 study the effect of nasopharyngeal inhaled PM on the peripheral immune response,  
440 splenocytes of EAE mice were stimulated with MOG<sub>35-55</sub> peptide and analyzed by

441 flow cytometry. As shown in [Figure S1](#), splenocytes in PM-treated group exhibited  
442 significantly increased numbers and expression of co-stimulatory molecules (e.g.,  
443 MHC class II, CD80, CD86) of antigen-presenting cells (CD11c+), and higher  
444 percentage of IFN- $\gamma$ +, IL-17+, and TNF- $\alpha$ + CD4+ T cells. Overall, these results  
445 showed that PM exposure possibly aggravates inflammatory demyelination of the  
446 CNS.

447

## 448 **2. PM aspiration exacerbates demyelination and prevents remyelination in a** 449 **toxin-induced demyelination model**

450 We then investigated the impact of PM aspiration on cuprizone-induced  
451 demyelination, another classical mammalian animal model that for studying  
452 pathological processes associated with demyelinating diseases. Experimental design  
453 and treatment paradigms were shown in [Figure 2A](#). As shown in [Figure 2B](#), body  
454 weight of mice in PBS group showed progressive loss during the 4 weeks of  
455 cuprizone fed. After cuprizone withdrawn and returning to normal diet for 2 weeks,  
456 weight loss was gradual recovery and remyelination was observed in the corpus  
457 callosum area of mice in the PBS group ([Figure 2B, C](#)). However, continuous PM  
458 aspiration obviously inhibited the weight gain ([Figure 2B](#)). PM exposure significantly  
459 increased the susceptibility to demyelination injury caused by cuprizone (oral  
460 administration for 3 weeks), and prevented CNS spontaneous remyelination in the  
461 corpus callosum even after cuprizone withdrawn for 2 weeks, as detected by  
462 FluoroMyelin staining ([Figure 2C](#)). The numbers of CNS resident immune cells,

463 GFAP+ astrocytes and IBA1+ microglia, were also significantly increased in the  
464 PM-treated group both at demyelination and remyelination process, indicating that  
465 PM exposure exacerbated neuroinflammation and demyelination in toxic-induced  
466 demyelinating mice, and significantly inhibited myelin repair (Figure 2C). Under  
467 4-week-cuprizone treatment and 2-week normal chow, most of the axons in the corpus  
468 callosum re-wrapped by thin myelin sheath (spontaneous remyelination) in  
469 PBS-treated group, while in PM group only few axons with loosely wrapped myelin  
470 were observed as evaluated by ultrastructural electron microscopy (EM; Figure 2D).  
471 PM aspiration not only significantly reduced the number of myelination axon, but also  
472 increased G-ratio of the remyelinated axons, indicating a poor recovery from  
473 demyelination (Figure 2E). These findings suggest that PM aspiration exacerbates  
474 demyelination and prevents remyelination in toxin-induced demyelination model.

475

### 476 **3. PM exposure during pregnant and postnatal delays myelinogenesis in the** 477 **developing nervous system**

478 Given that the respirable PM aggravated myelin injury under pathological conditions  
479 (immune- and toxicity-induced demyelination), we then investigated whether  
480 maternal PM exposure during pregnancy affected the postnatal myelination in the  
481 developing nervous system under nonpathological conditions by employing the  
482 neonatal mouse myelinogenesis model. We hypothesized that PM aspiration during  
483 pregnant and neonatal period would inhibit precocious oligodendrocyte differentiation  
484 and myelination; therefore, we chose the postnatal day 14 to examine the extent of

485 myelination in the developing corpus callosum, because the establishment of the  
486 myelin sheath completes within the first 3 weeks postnatally in rodents  
487 (Osorio-Querejeta et al. 2017) (Figure 3A). As shown in Figure 3B & C, 14 days after  
488 birth the extent of MBP intensity in the corpus callosum of PBS-treated group were  
489 achieved  $33.4 \pm 8.5\%$  per field, while PM treatment significantly decreased the  
490 intensity of MBP staining to  $10.1 \pm 2.6\%$ , indicative of a 70% reduction in myelination  
491 compared with the PBS-treated littermates at this time point ( $p < 0.001$ ). The numbers  
492 of IBA1+ microglia and GFAP+ astrocytes were also increased significantly  
493 following the PM treatment, indicating the widespread inflammation in the brains of  
494 offspring mice and the critical role of micro- and astrogliosis in  
495 myelination/demyelination (Figure 3B & C). Lower numbers of myelination axons as  
496 well as thinner myelin sheathes were found in the PM treatment group than those of  
497 the PBS-treated littermates at postnatal Day 14 by EM (Figure 3D & E). The  
498 expression levels of pro-inflammatory cytokines such as TNF- $\alpha$ , IL-1 $\beta$ , IL-6, and  
499 iNOS were remarkably increased in PM-treated mice, with significantly inhibited  
500 myelination and myelin protein gene expression compared with the PBS control  
501 (Figure 3F). These pathological changes prompt us to find out if the delayed myelin  
502 development induced by PM exposure resulted in any adverse effects in neurological  
503 function. Balance and motor coordination were evaluated in a rotating rod, beam  
504 walking, and tight rope test. In the rotating rod test at accelerating speed, PM-treated  
505 mice exhibited a significant shorter latency to fall off the rod than that of PBS-treated  
506 mice (decreased -32.6% in the time of staying on the rotating rod, Figure 3G,

507  $p < 0.001$ ). Disturbances of motor dysfunction in PM-treated mice were also observed  
508 in the beam walking and tight rope test. Mice exposed to PM had significantly worse  
509 motor performance, as the time taken by mice to traverse a narrow beam or cotton  
510 rope increased remarkably compared to PBS-treated control mice (Figure 3G,  $p < 0.05$ ).  
511 These results clearly indicate that maternal exposure to PM during pregnancy have  
512 adverse effect on fetal and neonate mouse, which lead to pathological and structural  
513 changes in the myelin development, activation of astrocytes and microglia, thus  
514 directly contributes to dysfunction of movement coordination ability of mouse  
515 offspring.

516

#### 517 **4. PM exposure boosts microglial activation and pathogenicity**

518 Although little is known about the mechanism of PM exacerbating myelin damage,  
519 we have observed a significant increase of activated IBA1+ microglia in the  
520 demyelination/myelinogenesis animal models (Figure 1F and G, Figure 2C, Figure 3B  
521 and C). There are similar pathological features in human autopsy study with high  
522 levels of air pollution (Knochelmann et al. 2018), suggesting that abnormal activation  
523 of microglia may be the main cellular event and pathogenic factor in the process of  
524 PM promoting neuroinflammation and demyelination. As the resident innate immune  
525 cells and sentinels surveying the CNS environment, microglia respond quickly to a  
526 vast repertoire of stimuli, including environmental toxins, wound, pathogens, or  
527 cellular damage (Wolf et al. 2017). The abnormal activation of microglia under PM  
528 exposure in the demyelination/myelinogenesis animal models led us to hypothesize



529 that the polarization states may have critical roles in regulating the de/remyelination.  
530 To test this, primary microglia were stimulated by exposure to PM, using endotoxin  
531 lipopolysaccharide (LPS) as a positive control. It is well accepted that LPS is a classic  
532 stimuli to induce microglia into pro-inflammatory phenotype. Interestingly, incubation  
533 of PM with the primary microglia could mimic, even completely replace, the effect of  
534 LPS (Figure 4A-D). Most of the cells in PBS group were spindle-shaped with slender  
535 branches, while under LPS or PM treatment, the cell body became larger and rounder  
536 with decreased and thickened protrusions, presenting typical "amoeba-like" activation  
537 morphologies (Figure 4A). Similar to LPS stimulation, PM-treated microglia  
538 expressed higher levels of MHC II, CD86, and CD80 (Figure 4B). Because  
539 upregulation of pro-inflammatory factors or markers is one of the hallmarks of  
540 microglial activation, we also examined the polarization by gene expression profiling  
541 and enzyme-linked immuno-absorbant assay (ELISA). As shown in Figure 4C and D,  
542 both PM- and LPS-primed microglia are characterized by expression of  
543 pro-inflammatory cytokines and markers like TNF- $\alpha$ , IL-6, IL-1 $\beta$ , iNOS, CCL2,  
544 PTGS2, and STAT3, with remarkably decreased gene expression level of  
545 anti-inflammation markers (IL-10, Arg-1, and IL-4) , indicating that PM stimulation,  
546 similar to LPS, promotes microglia activation and induces cell switch from a resting  
547 state to a pro-inflammatory phenotype.

548 These observations prompted us to explore whether PM exposure of microglia  
549 resulted in functional changes as well as disease-promoting activity. To test this, we  
550 assessed the responses of microglia-CD4<sup>+</sup> T cell co-culture as well as purified

551 primary OPCs to application of microglia-conditioned media (MCM) *in vitro*. As  
552 shown in [Figure 4E](#), PBS-, LPS- or PM-activated microglia were co-cultured with  
553 purified naïve CD4<sup>+</sup> T cells in the context of Th17 differentiation. LPS- and  
554 PM-primed microglia Similar to LPS stimulation, PM-treated microglia led to  
555 comparable induction of IL-17 and IFN- $\gamma$  secretion by CD4<sup>+</sup> T cells ([Figure 4E](#)). In  
556 addition, OPCs treated with control medium (OPC differentiation medium) or  
557 PBS-MCM for 7 d became mature MBP<sup>+</sup> oligodendrocytes with normal branching of  
558 the processes, while the addition of LPS- or PM- MCM prohibited OPC  
559 differentiation, evidenced by the significantly decreased numbers and branch score of  
560 MBP<sup>+</sup> cells, ([Figure 4F](#)). These data indicate that PM and LPS may have analogous  
561 biological activities and act on the same signal pathway of microglia priming.

562 TLR-4 (Toll like receptor-4), as the immunoreceptor of LPS, is a critical  
563 regulator of microglia activation. After activation of TLR-4 on the microglia  
564 membrane, a cascade of signal transduction may phosphorylate the downstream  
565 nuclear transcription factor NF- $\kappa$ B, leading to increased expression of  
566 pro-inflammatory cytokines such as TNF- $\alpha$ , IL-6, IL-1 $\beta$ . As shown in [Figure 4G-I](#),  
567 PM treatment, similar to LPS, significantly upregulated the phosphorylation of NF- $\kappa$ B  
568 (p-NF- $\kappa$ B) and the expression of pro-inflammatory cytokines (TNF- $\alpha$ , IL-6, and IL-1 $\beta$ )  
569 in cultured microglia. However, the induction was blocked by TAK242, ST2826 and  
570 SN50, inhibitors that specifically impede the intracellular activities of TLR4, Myd88  
571 and NF- $\kappa$ B, respectively, in the TLR-4/NF- $\kappa$ B signaling pathway ([Figure 4G and H](#)).  
572 In EAE model, administration of TAK242 and PDTC, pharmacological inhibitors of

573 TLR4 and NF- $\kappa$ B, effectively reversed the deterioration of the disease resulted from  
574 PM exposure ([Figure 4J](#)). Taken together, these findings suggest that TLR-4/NF- $\kappa$ B  
575 signaling drives PM-induced microglia activation.

576

## 577 **5. Mechanism of PM-induced microglia activation via TLR-4/NF- $\kappa$ B signaling**

### 578 **axis**

579 Microglia plays important roles in the pathological demyelination, as well as  
580 myelination or remyelination under physiological condition. Our cytological data of  
581 PM action on microglia identified TLR-4/NF- $\kappa$ B signaling as a candidate regulator  
582 axis of microglia pathogenic activities. To evaluate the role of TLR-4/NF- $\kappa$ B pathway  
583 in PM-stimulated microglia, we first proceeded to investigate the PM-specific effects  
584 on gene transcription on microglia by using RNA sequencing (RNA-seq, [Figure](#)  
585 [5A-E](#)). Results shown that 145 genes were upregulated and 57 were downregulated  
586 under PM perturbation compared with PBS control (fold change > 2; false discovery  
587 rate [FDR] < 0.001; [Figure 5A](#)). As expected, the upregulated mRNAs in PM-treated  
588 group encode a cohort of LPS response genes and inflammatory regulators, including  
589 Mmp9, Lif, Nod2, Nfkb1, and Socs3, consistent with the microglia activation  
590 phenotype ([Figure 5A-C](#)). Similarly, real-time qPCR analysis confirmed a remarkable  
591 induction in TLR-4/NF- $\kappa$ B signaling associated genes, such as Nod2, Tnfrsf1 $\beta$ ,  
592 Tnfaip3, Fas, and Nfkb1 ([Figure 5B](#)). Gene Ontology (GO) enrichment analysis  
593 showed that the upregulated genes in PM-treated group are enriched for those that  
594 function in cellular response to LPS and biotic stimulus, positive regulation of defense

595 response, and activation of inflammation-associated pathways, while the  
596 downregulated genes are enriched for those that function in negative regulation of cell  
597 proliferation and inflammatory response (Figure 5C&D). The gene ontology analysis  
598 demonstrated that PM-regulated genes in microglia positively associated with  
599 Toll-like receptor, NF- $\kappa$ B, TNF signaling pathway, as well as cytokine-cytokine  
600 receptor interaction in KEGG pathways (Figure 5E).

601 Some of the effects on NF- $\kappa$ B regulation can be direct, whereas others can reflect  
602 indirect events. To better distinguish these possibilities, chromatin  
603 immunoprecipitation sequencing (ChIP-seq) was performed to assess the direct  
604 transcriptional targets and genome-wide occupancy of NF- $\kappa$ B in PM-stimulated  
605 microglia (Figure 5F-H). The majority of NF- $\kappa$ B binding peaks were present in intron  
606 (31.15%) and intergenic (34.43%) regions and only 21.31% of that located at  
607 promoter regions (Figure 5F). GO analysis showed a significant enrichment for genes  
608 involved in neuroactive ligand-receptor interaction, suggesting potential  
609 NF- $\kappa$ B-targeted gene network in microglia specifically responding to PM stimulation  
610 (Figure 5G). Among NF- $\kappa$ B-targeted genes were those encoding factors involved in  
611 the ADAMTS family (a disintegrin and metalloproteinase with thrombospondin  
612 motifs, *Adamts7*), potassium voltage-gated channel family (*Kcnh2*), interleukin 1  
613 family member (*IL1f9*), and matrix metalloproteinase gene family (*MMP2*) (Figure  
614 5H). There were 91 genes overlapped between those affected by PM perturbation and  
615 directly bound by NF- $\kappa$ B; among them, 77 genes were upregulated and 14 genes were  
616 downregulated (Figure 5I). The bound targets were also highly enriched with cellular

617 response to stimuli (virus, cytokines, LPS, drugs, wounding etc.) and immune  
618 responses (Figure 5J). Together, these data suggest that NF- $\kappa$ B-associated  
619 inflammation signaling mediated a core network of genes that control PM-triggered  
620 microglia priming.

621

## 622 **Discussion**

623 Demyelination is the common pathological features of several neurological diseases.  
624 Although the pathogenic factors are exactly unknown so far, environmental trigger,  
625 especially for atmospheric PM, gained increasing attention in neuropathology of  
626 demyelination diseases. This is evidenced by the observations that exposure to higher  
627 levels of ambient airborne PM was epidemiologically associated with the incidence  
628 and development of common demyelination diseases such as MS, optic neuromyelitis,  
629 leukodystrophy, and white matter stroke clinically (Babadjouni et al. 2017; Boda et al.  
630 2020; de Prado Bert et al. 2018; Khan et al. 2019; Younan et al. 2020). However, the  
631 mechanisms underlying how inhaled air pollution modulates CNS-resident cells to  
632 contribute to the pathogenesis of neurologic diseases is complex and poorly  
633 understood. Therefore, to create targeted and effective therapies, mechanism of action  
634 (e.g., specific signaling transduction and responders) that mediates the exacerbating or  
635 mitigating clinical symptoms of disease needs to be elaborated.

636 In the present study, we aim to identify critical cellular and molecular targets that  
637 alter demyelination disease after PM exposure, to identify the therapeutic strategies  
638 that may be particularly applicable to patients who are exposed to high levels of PM.

639 We demonstrate that PM exposure exacerbates CNS myelin injury, based on three  
640 complementary animal models, the immune-induced EAE model, the toxicity-induced  
641 demyelination model that under minimal or non-inflammatory microenvironments, as  
642 well as the myelinogenesis model during postnatal development. As summarized in  
643 [Figure 6](#), this is the first comprehensive description of rodent *in vivo* responses to  
644 atmospheric PM, under pathological and physiological condition, which shows  
645 excessive boost of microglia via the TLR4/NF- $\kappa$ B signaling axis.

646 We found that PM aspiration obviously increased the expression of  
647 proinflammatory factors (e.g., IL-6, IL-1 $\beta$  and TNF- $\alpha$ ), induced activated IBA1+  
648 microglia, decreased MBP intensity in the brain, and impaired normal  
649 oligodendrocyte maturation and function. Moreover, maternal PM exposure induced  
650 the activation of astrocytes and microglia and subsequent neuroinflammation and  
651 myelin dysplasia in the brain of mouse offspring. Consistent with our results, recent  
652 studies have reported that air pollutants including PM caused neuroinflammatory  
653 responses, promoted demyelination, and caused AD-like pathologies and brain  
654 impairment both in adult mouse and offspring (Calderón-Garcidueñas et al. 2004;  
655 Chen et al. 2018; Ku et al. 2017; O'Driscoll et al. 2018) , indicating that the brain, and  
656 in particular the glial cells, may be compromised by PM exposure during  
657 developmental windows.

658 Surprisingly, it was found that the types of PMs result in differential outcomes in  
659 CNS damage. For example, O'Driscoll et al. reported that chronic dosing of intranasal  
660 SRM1649b PM was not sufficient to worsen severity of EAE but did delay onset of

661 EAE, while acute dosing of intranasal SRM1649b PM reduced severity of EAE  
662 (O'Driscoll et al. 2019). At the same time, they found that two different diesel PM  
663 samples enhanced Th17 differentiation and aggravated EAE (O'Driscoll et al. 2018).  
664 The authors concluded that the active components of PM, not the total mass, are the  
665 crucial factor mediating the biological responses.

666 Our data demonstrated that the cellular mechanisms of PM aggravated the  
667 neuroinflammation and demyelination could be mediated by excessive microglial  
668 activation by producing neurotoxic pro-inflammatory factors. Microglia are the  
669 resident innate immune cells in the CNS, which respond to perturbation caused by  
670 environmental stimuli, toxins, trauma or diseases hypersensitive, and performs  
671 continuous monitoring (Yeh and Ikezu 2019). A number of clinical and  
672 neuropathological studies have shown that priming microglia exhibit a typical  
673 pro-inflammatory phenotype, which is one of the key pathogenic factors during aging  
674 and in a variety of CNS-diseases including AD, PD, MS, amyotrophic lateral sclerosis,  
675 and stroke (Wolf et al. 2017). Consistent with our results, recent studies have shown  
676 that PM exposure induced neuroinflammatory including increase inflammatory  
677 cytokine secretion *in vivo* and *in vitro* (Morgan et al. 2011; Woodward et al. 2017b).  
678 Our study extends these results in the demyelination lesion specificity of the PM  
679 response.

680 Guided by the gene expression analysis, we defined a role for PM in the  
681 activation of TLR4/NF- $\kappa$ B-driven pathogenic activities in microglia. PM enhances  
682 pathologic microglia activation in a TLR4/NF- $\kappa$ B-dependent manner leading to

683 worsened demyelination disease in a murine model of EAE. TLR-4/NF- $\kappa$ B signal  
684 pathway is involved in the regulation of multiple important physiological and  
685 pathological processes, such as immunity, inflammation, tumorigenesis, aging, and  
686 neurological diseases (Mitchell et al. 2016). NF- $\kappa$ B is a ubiquitous DNA-binding  
687 transcription factor, which has differential biological effects depending on the extent  
688 and duration of activation (Mitchell et al. 2016). It is also a typical inducible  
689 transcription factor, thus the direct target gene profile and corresponding regulatory  
690 networks are variable with different stimuli (e.g., LPS, TNF- $\alpha$ , IL-1 $\beta$  or PM) among  
691 different types of cells (e.g., lymphocytes, fibroblasts, epithelial cells or microglia)  
692 (Martin et al. 2020). In other words, the target genes regulated by NF- $\kappa$ B is stimuli  
693 and cell-type specific. Although we found PM incubation with microglia mimic the  
694 effect of LPS, which present the typical "amoeba-like" activation morphologies and  
695 high expression of pro-inflammation cytokines and markers like TNF- $\alpha$ , IL-6, IL-1 $\beta$ ,  
696 iNOS, CCL2, PTGS2, and STAT3, the target gene profile of PM and LPS is distinct.  
697 These findings are consistent with the exacerbation of lung LPS inflammatory  
698 responses when combined with PM exposure (Woodward et al. 2017a), indicating that  
699 the target gene responses of PM were not only due to endotoxin presence in the PM  
700 samples, but may also be attributed to the high chemical heterogeneity of PM.

701

## 702 **Conclusion**

703 Taken together, our present study confirms that PM inhalation leads to aggravate CNS  
704 demyelination, and this action is associated with a previously unrecognized role for



705 TLR4/NF- $\kappa$ B signaling-mediated microglia activation. The results suggest a novel  
706 mechanism for PM-produced adverse effects on the nervous system and present a  
707 potential intervention target for prevention. Importantly, given the specific nature of  
708 PM, e.g., the biologic responses of this complex mixtures is further influenced by the  
709 source and constituents, the route of exposure, the particulate matrix within which  
710 they reside, the potential different mechanisms and bio-availability of these  
711 components, and the genetic differences of the recipients, we believe that the  
712 investigation of these differences is necessary to clarify the characteristics of PM  
713 exposure and the potential to cause CNS disease. Only then will it be reasonable to  
714 propose targeted remediation to stem the tide of demyelination disease that is growing  
715 in populations facing air pollution.

716

## 717 **References**

- 718 Babadjouni RM, Hodis DM, Radwanski R, et al. (2017) Clinical effects of air pollution on the central  
719 nervous system; a review. *Journal of clinical neuroscience : official journal of the*  
720 *Neurosurgical Society of Australasia* 43:16-24 doi:10.1016/j.jocn.2017.04.028
- 721 Bai L, Burnett RT, Kwong JC, et al. (2018) Long-term exposure to air pollution and the incidence of  
722 multiple sclerosis: A population-based cohort study. *Environmental research* 166:437-443  
723 doi:10.1016/j.envres.2018.06.003
- 724 Boda E, Rigamonti AE, Bollati V (2020) Understanding the effects of air pollution on neurogenesis and  
725 gliogenesis in the growing and adult brain. *Current opinion in pharmacology* 50:61-66  
726 doi:10.1016/j.coph.2019.12.003
- 727 Bové H, Bongaerts E, Slenders E, et al. (2019) Ambient black carbon particles reach the fetal side of  
728 human placenta. *Nature communications* 10(1):3866 doi:10.1038/s41467-019-11654-3
- 729 Calderón-Garcidueñas L, Reed W, Maronpot RR, et al. (2004) Brain inflammation and Alzheimer's-like  
730 pathology in individuals exposed to severe air pollution. *Toxicologic pathology* 32(6):650-8  
731 doi:10.1080/01926230490520232
- 732 Caplin A, Ghandehari M, Lim C, Glimcher P, Thurston G (2019) Advancing environmental exposure  
733 assessment science to benefit society. *Nature communications* 10(1):1236  
734 doi:10.1038/s41467-019-09155-4

- 735 Chandrakumar A, t Jong GW (2019) Maternal Exposure to Air Pollution During Pregnancy and Autism  
736 Spectrum Disorder in Offspring. *JAMA pediatrics* 173(7):697-698  
737 doi:10.1001/jamapediatrics.2019.0925
- 738 Chen H, Lou H, Wang Y, Cao F, Zhang L, Wang C (2018) Comparison of the efficacy and mechanisms of  
739 intranasal budesonide, montelukast, and their combination in treatment of patients with  
740 seasonal allergic rhinitis. *International forum of allergy & rhinology* 8(11):1242-1252  
741 doi:10.1002/alr.22197
- 742 de Prado Bert P, Mercader EMH, Pujol J, Sunyer J, Mortamais M (2018) The Effects of Air Pollution on  
743 the Brain: a Review of Studies Interfacing Environmental Epidemiology and Neuroimaging.  
744 *Current environmental health reports* 5(3):351-364 doi:10.1007/s40572-018-0209-9
- 745 Goldman SA, Kuypers NJ (2015) How to make an oligodendrocyte. *Development (Cambridge, England)*  
746 142(23):3983-95 doi:10.1242/dev.126409
- 747 Goldman SA, Nedergaard M, Windrem MS (2012) Glial progenitor cell-based treatment and modeling  
748 of neurological disease. *Science (New York, NY)* 338(6106):491-5  
749 doi:10.1126/science.1218071
- 750 Huang JK, Jarjour AA, Nait Oumesmar B, et al. (2011) Retinoid X receptor gamma signaling accelerates  
751 CNS remyelination. *Nature neuroscience* 14(1):45-53 doi:10.1038/nn.2702
- 752 Hughes AN, Appel B (2020) Microglia phagocytose myelin sheaths to modify developmental  
753 myelination. *Nature neuroscience* 23(9):1055-1066 doi:10.1038/s41593-020-0654-2
- 754 Khan A, Plana-Ripoll O, Antonsen S, et al. (2019) Environmental pollution is associated with increased  
755 risk of psychiatric disorders in the US and Denmark. *PLoS biology* 17(8):e3000353  
756 doi:10.1371/journal.pbio.3000353
- 757 Klocke C, Allen JL, Sobolewski M, et al. (2017) Neuropathological Consequences of Gestational  
758 Exposure to Concentrated Ambient Fine and Ultrafine Particles in the Mouse. *Toxicological*  
759 *sciences : an official journal of the Society of Toxicology* 156(2):492-508  
760 doi:10.1093/toxsci/kfx010
- 761 Knochelmann HM, Dwyer CJ, Bailey SR, et al. (2018) When worlds collide: Th17 and Treg cells in  
762 cancer and autoimmunity. *Cellular & molecular immunology* 15(5):458-469  
763 doi:10.1038/s41423-018-0004-4
- 764 Ku T, Li B, Gao R, et al. (2017) NF- $\kappa$ B-regulated microRNA-574-5p underlies synaptic and cognitive  
765 impairment in response to atmospheric PM(2.5) aspiration. *Particle and fibre toxicology*  
766 14(1):34 doi:10.1186/s12989-017-0215-3
- 767 Kumar N, Abboud H (2019) Iatrogenic CNS demyelination in the era of modern biologics. *Multiple*  
768 *sclerosis (Houndmills, Basingstoke, England)* 25(8):1079-1085  
769 doi:10.1177/1352458519828601
- 770 Maher BA, Ahmed IA, Karloukovski V, et al. (2016) Magnetite pollution nanoparticles in the human  
771 brain. *Proceedings of the National Academy of Sciences of the United States of America*  
772 113(39):10797-801 doi:10.1073/pnas.1605941113
- 773 Malpass K (2012) Multiple sclerosis: 'Outside-in' demyelination in MS. *Nature reviews Neurology*  
774 8(2):61 doi:10.1038/nrneurol.2011.217
- 775 Marin MA, Carmichael ST (2019) Mechanisms of demyelination and remyelination in the young and  
776 aged brain following white matter stroke. *Neurobiology of disease* 126:5-12  
777 doi:10.1016/j.nbd.2018.07.023

- 778 Martin EW, Pacholewska A, Patel H, Dashora H, Sung MH (2020) Integrative analysis suggests cell  
779 type-specific decoding of NF- $\kappa$ B dynamics. *Science signaling* 13(620)  
780 doi:10.1126/scisignal.aax7195
- 781 Mitchell S, Vargas J, Hoffmann A (2016) Signaling via the NF $\kappa$ B system. *Wiley interdisciplinary reviews*  
782 *Systems biology and medicine* 8(3):227-41 doi:10.1002/wsbm.1331
- 783 Mitew S, Kirkcaldie MT, Halliday GM, Shepherd CE, Vickers JC, Dickson TC (2010) Focal demyelination  
784 in Alzheimer's disease and transgenic mouse models. *Acta neuropathologica* 119(5):567-77  
785 doi:10.1007/s00401-010-0657-2
- 786 Morgan TE, Davis DA, Iwata N, et al. (2011) Glutamatergic neurons in rodent models respond to  
787 nanoscale particulate urban air pollutants in vivo and in vitro. *Environmental health*  
788 *perspectives* 119(7):1003-9 doi:10.1289/ehp.1002973
- 789 O'Driscoll CA, Owens LA, Gallo ME, et al. (2018) Differential effects of diesel exhaust particles on T cell  
790 differentiation and autoimmune disease. *Particle and fibre toxicology* 15(1):35  
791 doi:10.1186/s12989-018-0271-3
- 792 O'Driscoll CA, Owens LA, Hoffmann EJ, et al. (2019) Ambient urban dust particulate matter reduces  
793 pathologic T cells in the CNS and severity of EAE. *Environmental research* 168:178-192  
794 doi:10.1016/j.envres.2018.09.038
- 795 Osorio-Querejeta I, Sáenz-Cuesta M, Muñoz-Culla M, Otaegui D (2017) Models for Studying  
796 Myelination, Demyelination and Remyelination. *Neuromolecular medicine* 19(2-3):181-192  
797 doi:10.1007/s12017-017-8442-1
- 798 Pukos N, Goodus MT, Sahinkaya FR, McTigue DM (2019) Myelin status and oligodendrocyte lineage  
799 cells over time after spinal cord injury: What do we know and what still needs to be  
800 unwrapped? *Glia* 67(11):2178-2202 doi:10.1002/glia.23702
- 801 Scoles DR, Meera P, Schneider MD, et al. (2017) Antisense oligonucleotide therapy for spinocerebellar  
802 ataxia type 2. *Nature* 544(7650):362-366 doi:10.1038/nature22044
- 803 Shao QH, Chen Y, Li FF, et al. (2019) TLR4 deficiency has a protective effect in the MPTP/probenecid  
804 mouse model of Parkinson's disease. *Acta pharmacologica Sinica* 40(12):1503-1512  
805 doi:10.1038/s41401-019-0280-2
- 806 Skripuletz T, Manzel A, Gropengießer K, et al. (2015) Pivotal role of choline metabolites in  
807 remyelination. *Brain : a journal of neurology* 138(Pt 2):398-413 doi:10.1093/brain/awu358
- 808 Skripuletz T, Miller E, Moharreggh-Khiabani D, et al. (2010) Beneficial effects of minocycline on  
809 cuprizone induced cortical demyelination. *Neurochemical research* 35(9):1422-33  
810 doi:10.1007/s11064-010-0202-7
- 811 Sripada K (2017) "Beginning with the Smallest Intake": Children's Brain Development and the Role of  
812 Neuroscience in Global Environmental Health. *Neuron* 95(6):1242-1245  
813 doi:10.1016/j.neuron.2017.08.009
- 814 Tateo F, Grassivaro F, Ermani M, Puthenparampil M, Gallo P (2019) PM2.5 levels strongly associate  
815 with multiple sclerosis prevalence in the Province of Padua, Veneto Region, North-East Italy.  
816 *Multiple sclerosis (Houndmills, Basingstoke, England)* 25(13):1719-1727  
817 doi:10.1177/1352458518803273
- 818 The Lancet N (2018) Air pollution and brain health: an emerging issue. *The Lancet Neurology*  
819 17(2):103 doi:10.1016/s1474-4422(17)30462-3
- 820 Wolf SA, Boddeke HW, Kettenmann H (2017) Microglia in Physiology and Disease. *Annual review of*  
821 *physiology* 79:619-643 doi:10.1146/annurev-physiol-022516-034406

- 822 Woodward NC, Levine MC, Haghani A, et al. (2017a) Toll-like receptor 4 in glial inflammatory  
823 responses to air pollution in vitro and in vivo. *Journal of neuroinflammation* 14(1):84  
824 doi:10.1186/s12974-017-0858-x
- 825 Woodward NC, Pakbin P, Saffari A, et al. (2017b) Traffic-related air pollution impact on mouse brain  
826 accelerates myelin and neuritic aging changes with specificity for CA1 neurons. *Neurobiology*  
827 of aging 53:48-58 doi:10.1016/j.neurobiolaging.2017.01.007
- 828 Wu W, Jin Y, Carlsten C (2018) Inflammatory health effects of indoor and outdoor particulate matter.  
829 *The Journal of allergy and clinical immunology* 141(3):833-844 doi:10.1016/j.jaci.2017.12.981
- 830 Xia XS, Wang JH, Song WD, Cheng XF (2020) [Spatio-temporal Evolution of PM(2.5) Concentration  
831 During 2000-2019 in China]. *Huan jing ke xue= Huanjing kexue* 41(11):4832-4843  
832 doi:10.13227/j.hjkk.202004108
- 833 Yang J, Jiang Z, Fitzgerald DC, et al. (2009) Adult neural stem cells expressing IL-10 confer potent  
834 immunomodulation and remyelination in experimental autoimmune encephalitis. *The*  
835 *Journal of clinical investigation* 119(12):3678-91 doi:10.1172/jci37914
- 836 Yeh H, Ikezu T (2019) Transcriptional and Epigenetic Regulation of Microglia in Health and Disease.  
837 *Trends in molecular medicine* 25(2):96-111 doi:10.1016/j.molmed.2018.11.004
- 838 Younan D, Petkus AJ, Widaman KF, et al. (2020) Particulate matter and episodic memory decline  
839 mediated by early neuroanatomic biomarkers of Alzheimer's disease. *Brain : a journal of*  
840 *neurology* 143(1):289-302 doi:10.1093/brain/awz348
- 841 Zhao CN, Xu Z, Wu GC, et al. (2019) Emerging role of air pollution in autoimmune diseases.  
842 *Autoimmunity reviews* 18(6):607-614 doi:10.1016/j.autrev.2018.12.010

843

#### 844 **Data availability**

845 The authors confirm that all data supporting the findings of this study are included in the  
846 main text and SI Appendix.

847

#### 848 **Acknowledgments**

849 This study was supported by the Chinese National Natural Science Foundation (Grant  
850 No. 82071396, 81771345, 31970771, 41771220, 81801195, U1804178), the Natural  
851 Science Foundation of Shaanxi Province, China (Grant No. 2019KJXX-022), the  
852 Fundamental Research Funds for the Central Universities (Grant No. GK202105002,  
853 GK202007022, 2020CSLZ010, S202110718278).

854

855 **Author contributions**

856 YZ and XL conceived and designed the experiments, analyzed data, and wrote the manuscript.

857 BH, SYD and ZQY carried out the experiments. LMW and CX helped with the electron

858 microscopy experiments and interpreted the data. RSA, XD, WM, YZ and YX discussed the

859 project and wrote the paper. SX and JZW co-supervised the study and wrote the paper. All

860 authors read and approved the final manuscript.

861

862 **Conflict of interest statement**

863 The authors declare that they have no conflicts of interest.

864

865

866

867

868

869

870

871

872

873

874

875

876 **Figure legend**

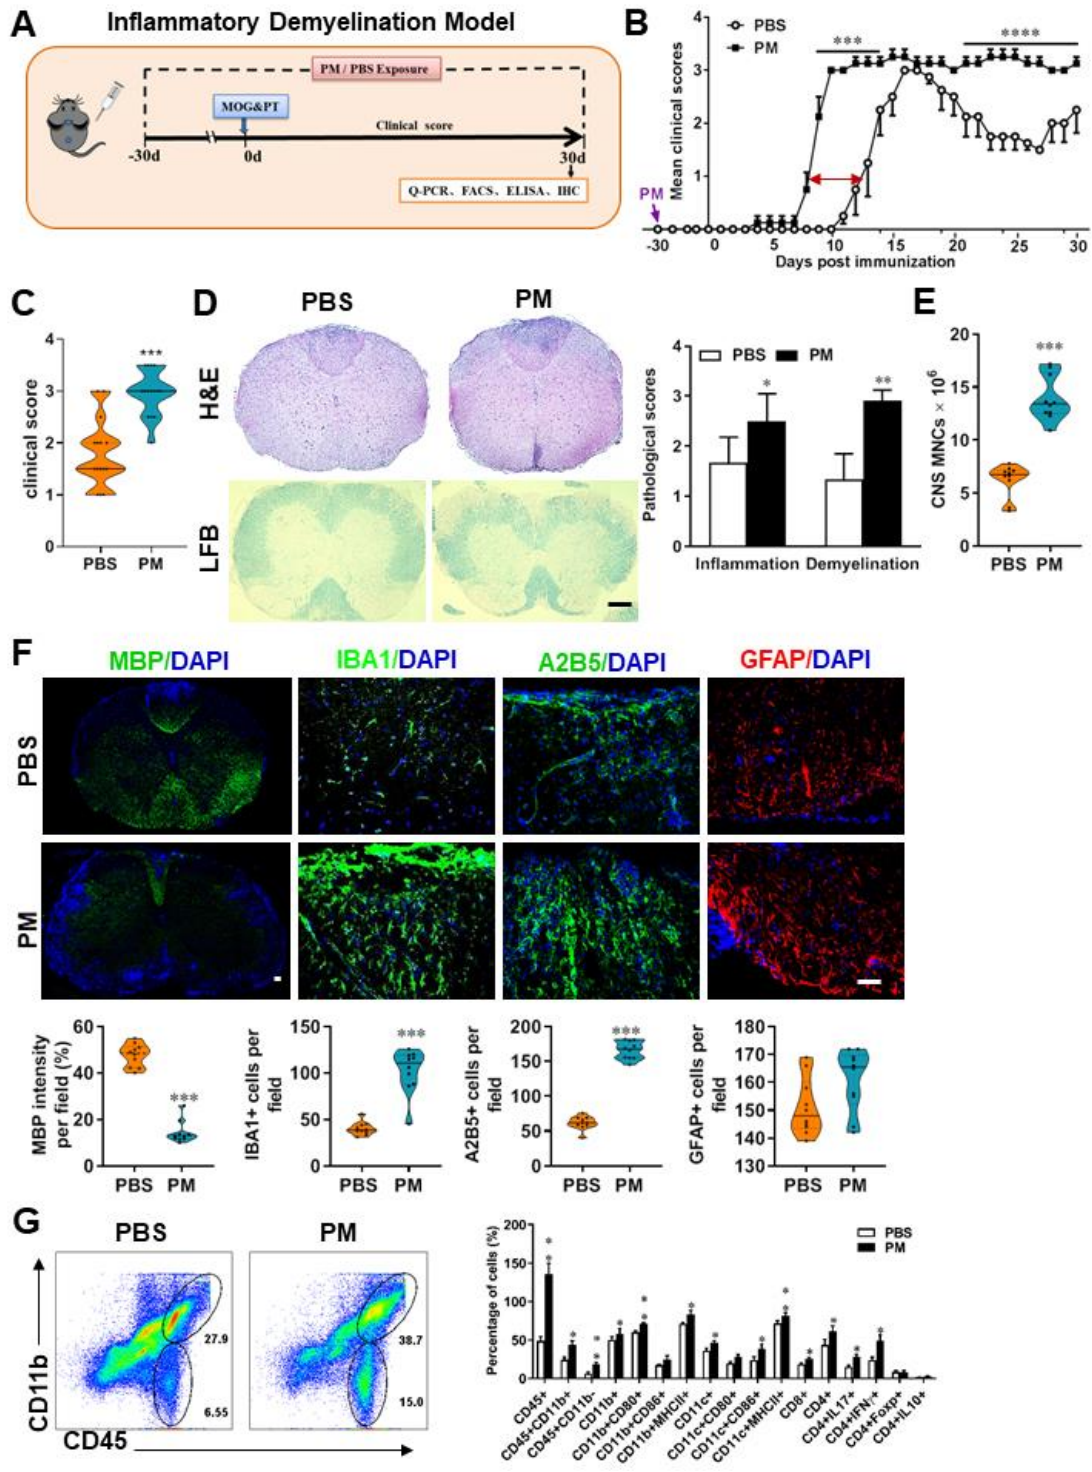

877

878 **Figure 1. PM exposure aggravates myelin injury in an inflammatory**

879 **demyelination model. (A)** Schematics of treatment strategies for EAE. Female, 8-10

880 week-old C57BL/6 mice were immunized with MOG<sub>35-55</sub> and pre-treated with PBS or

881 PM (nasopharyngeal inhalation, 5.0 mg/kg/d) daily, starting at day -30 (before  
882 immunization) until 30 p.i. All mice were sacrificed and their tissues (brain, spinal  
883 cord, draining lymph nodes, and spleen) were harvested for Q-PCR, flow cytometry,  
884 ELISA, or immunohistochemistry analysis at day 30 p.i. **(B)** EAE development was  
885 evaluated daily by two researchers blindly, following to a 0-5 scale. **(C)** Distribution  
886 of disease status at the end points of experiment (day 30 p.i.). **(D)** Thoracic spinal  
887 cord sections were assayed for inflammation by H&E and demyelination by Luxol  
888 fast blue (LFB), and CNS pathology was scored on a 0-3 scale. **(E)** Absolute number  
889 of CNS mononuclear cells (MNCs) in cell suspension of each mouse (brain and spinal  
890 cord) was counted. **(F)** Representative images of spinal cord sections of PBS- and  
891 PM-treated EAE mice in the dorsal funiculus. Quantitative analysis of MBP, IBA1,  
892 A2B5, and GFAP expression was assessed by using Image-Pro. The measured areas  
893 included 8-10 fields and covered virtually all the white matter of the spinal cord.  
894 Dorsal column at the thoracic spinal cord is shown as representative images. **(G)**  
895 Effects of PM treatment on the various inflammatory cells in the CNS. MNCs from  
896 spinal cords and brains were isolated at day 30 p.i., stimulated with MOG<sub>35-55</sub> (10  
897 µg/mL) for 24 h, and analyzed by flow cytometry. Cells were gated as  
898 CD45<sup>+</sup>CD11b<sup>+</sup> (microglia and infiltrating macrophages) and CD45<sup>+</sup>CD11b<sup>-</sup> (other  
899 infiltrating immune cells), and their subsets were further defined. One representative  
900 of 3 independent experiments is shown. Symbols represent mean ± SD; *n* = 4-5 mice  
901 in each group. \**p* < 0.05; \*\**p* < 0.01; \*\*\**p* < 0.001; \*\*\*\**p* < 0.0001, compared to  
902 PBS-treated group, two-way ANOVA comparison with Multiple *t*' tests. Scale bar =

903 40  $\mu\text{m}$  in D, Scale bar = 10  $\mu\text{m}$  in F.

904

905

906

907



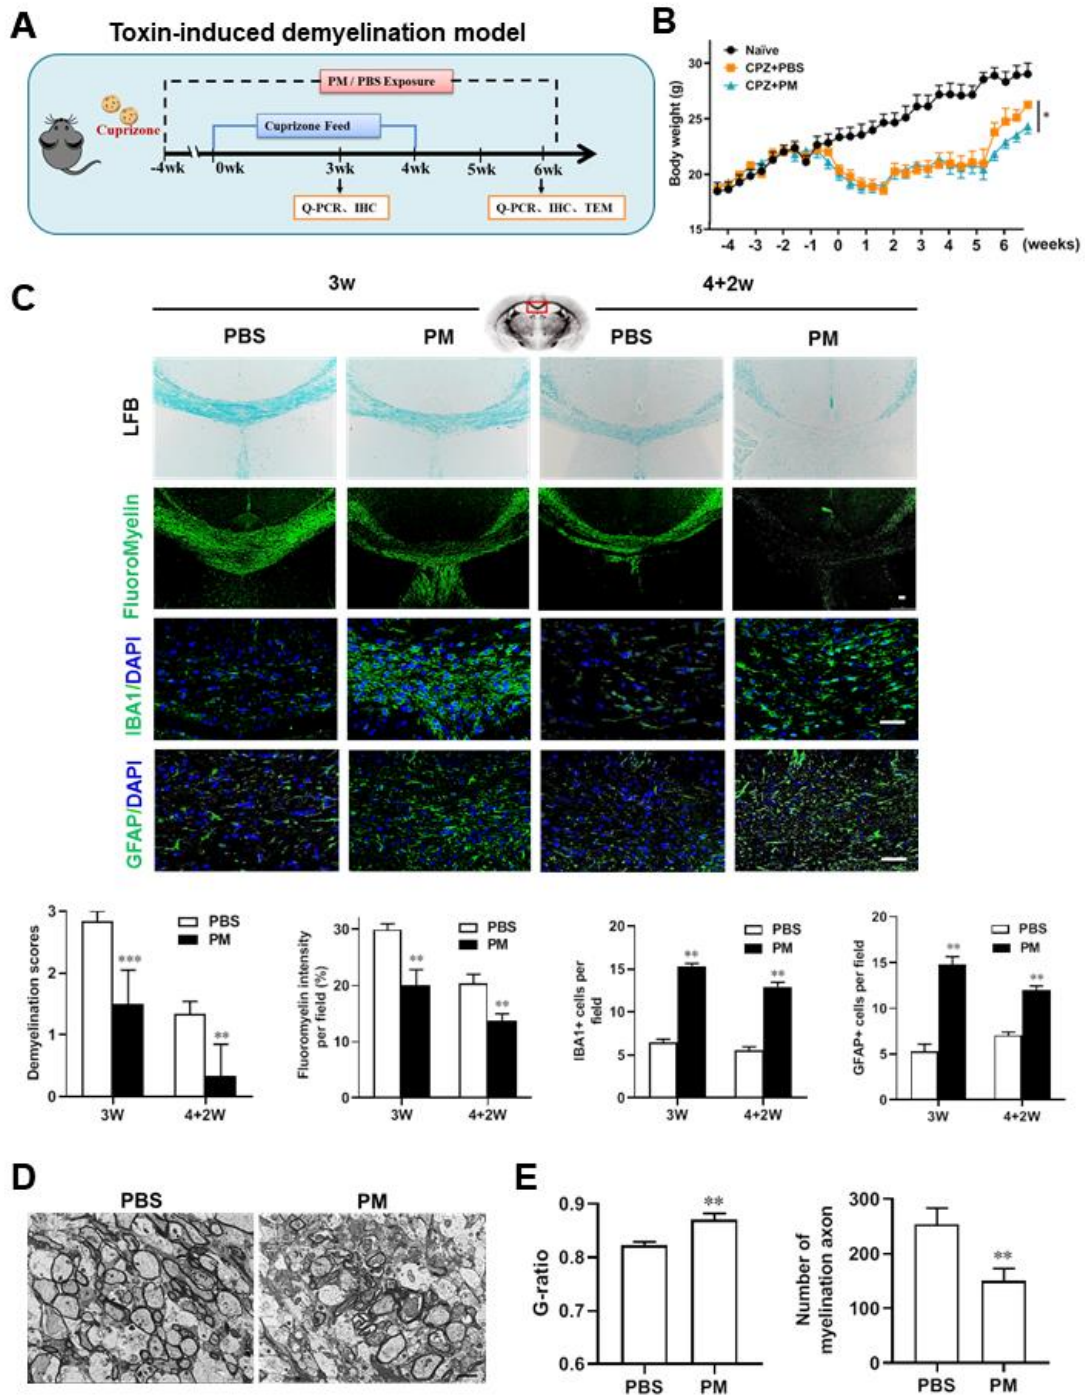

908

909 **Figure 2. PM aspiration exacerbates demyelination and prevents remyelination**

910 **in a toxin-induced demyelination model.** (A) Treatment paradigms. Male, 8-10

911 week-old C57BL/6 mice were pre-treated with PBS or PM (nasopharyngeal inhalation,

912 5.0 mg/kg/d) daily from week -4 to week 6. Standard rodent diet containing 0.2%

913 copper chelator cuprizone (CPZ), which causes CNS demyelination, were fed for 4  
914 weeks to achieve complete demyelination in the corpus callosum; cuprizone was then  
915 withdrawn and mice were again fed normal chow, allowing for spontaneous  
916 remyelination to occur within the next 2 weeks. **(B)** Body weights of mice from  
917 different groups were recorded every two days. **(C)** Representative images and  
918 quantitative analysis of LFB, FluoroMyelin, and immunohistochemistry (GFAP, IBA1)  
919 stains in the body of the corpus callosum of PM- or PBS-treated mice at different  
920 timepoints. **(D)** Representative electron microscopy images of the corpus callosum  
921 region isolated from PM- or PBS-treated mice at 2 weeks after cuprizone withdrawal.  
922 **(E)** Quantification of the myelinated axons shown in (D). The G-ratios (axon  
923 diameter/fiber diameter) of myelinated fibers and number of myelination axon were  
924 assessed by using Image-Pro. One representative of 3 independent experiments is  
925 shown. Symbols represent mean  $\pm$  SD;  $n = 5-8$  mice in each group.  $*p < 0.05$ ;  $**p <$   
926  $0.01$ ;  $***p < 0.001$ , compared to PBS-treated group, two-way ANOVA comparison  
927 with Tukey's multiple comparisons test. Scale bar = 50  $\mu\text{m}$  in C, Scale bar = 2  $\mu\text{m}$  in  
928 D.  
929

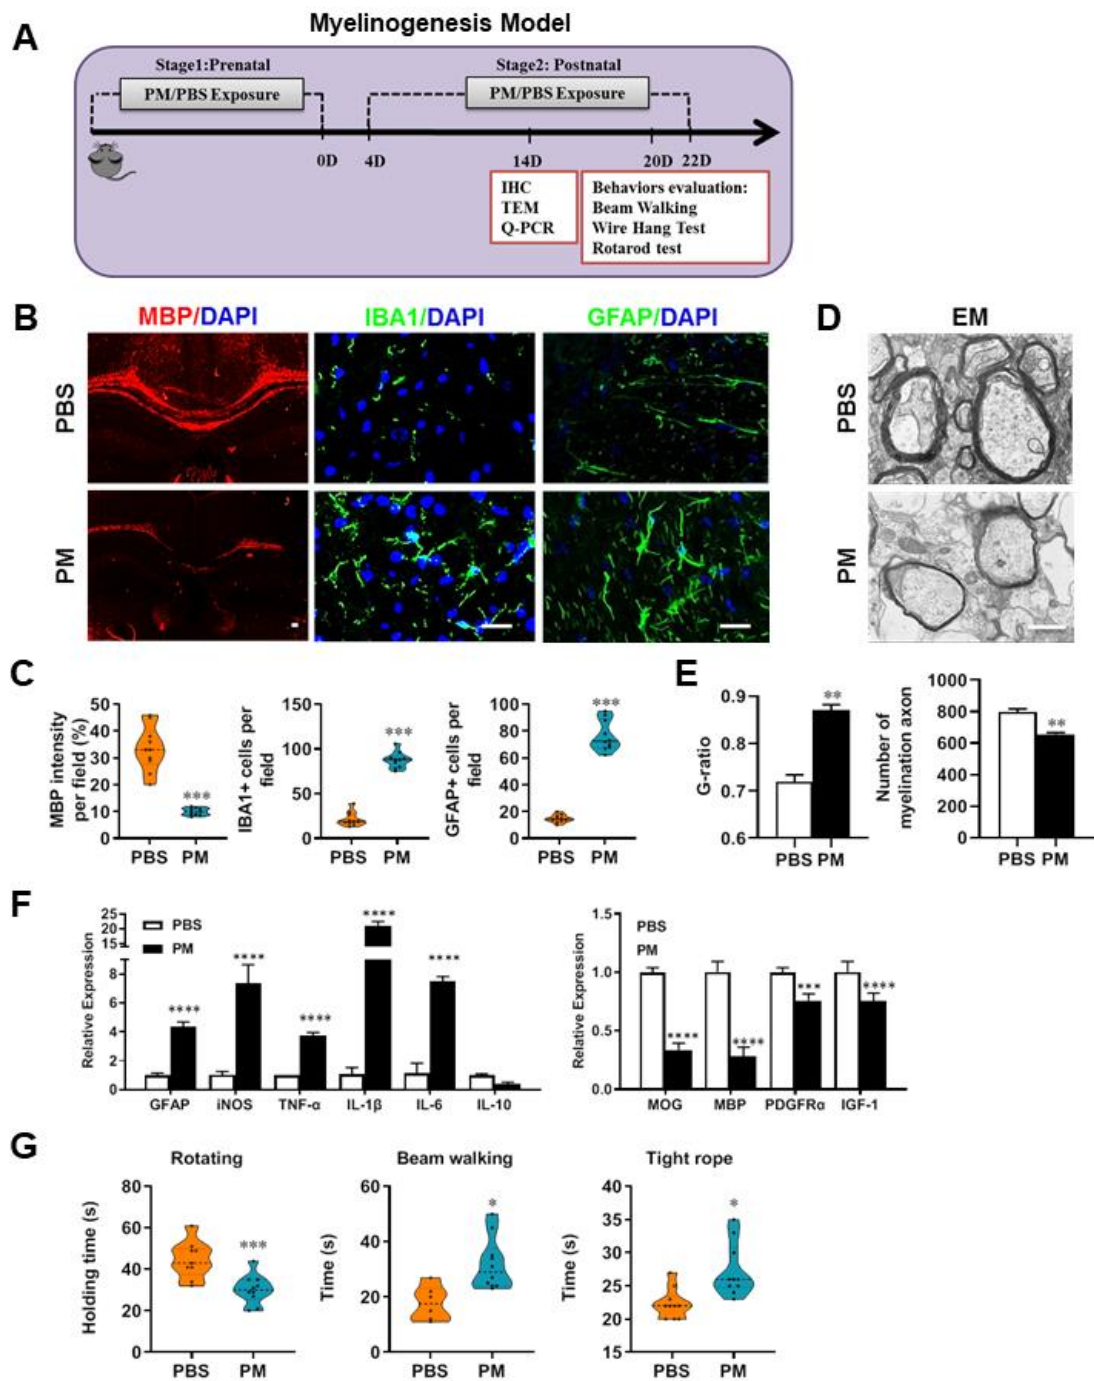

930

931 **Figure 3. PM exposure during pregnant and postnatal delays myelinogenesis in**  
 932 **the developing nervous system. (A) Schematics of treatment strategies. In order to**  
 933 **model a maternal PM exposure, pregnant mice were pre-treated with PBS or PM**  
 934 **(nasopharyngeal inhalation, 5.0 mg/kg/d) daily until parturition. Pups from PBS- or**

935 PM-treated group with similar weights were subsequently exposed to PBS or PM at  
936 postnatal Days 4-21. Brain was harvested for Q-PCR, immunohistochemistry, or TEM  
937 analysis at postnatal day 14, and behavioral evaluation was processed at postnatal  
938 Days 20-22. **(B)** Representative images of myelin content (MBP staining),  
939 microgliosis (IBA1 staining) and astrogliosis (GFAP staining) in the body of the  
940 corpus callosum of PM- or PBS-treated mice. **(C)** Quantitative analysis of MBP, IBA1,  
941 and GFAP expression using Image-Pro. **(D)** Representative electron microscopy  
942 images of the corpus callosum region isolated from PM- or PBS-treated mice. **(E)**  
943 Quantification of the G-ratios (axon diameter/fiber diameter) of myelinated fibers and  
944 number of myelination axon by Image-Pro. **(F)** mRNA relative expression of  
945 pro-inflammatory cytokines and myelin protein in corpus callosum of PM- or  
946 PBS-treated mice was detected by real-time PCR. **(G)** Effect of PM on motor balance  
947 and motor coordination were determined by behavioral evaluation (rotating rod, beam  
948 walking, and tight rope test). Data were collected from 3-5 separate mouse litters.  
949 Symbols represent mean  $\pm$  SD; \* $p$ < 0.05; \*\* $p$ < 0.01; \*\*\* $p$ <0.001; \*\*\*\* $p$ <0.0001,  
950 compared to PBS-treated group, two-way ANOVA comparison with Tukey's multiple  
951 comparisons test. Scale bar = 50  $\mu$ m in B, Scale bar = 1  $\mu$ m in D.

952

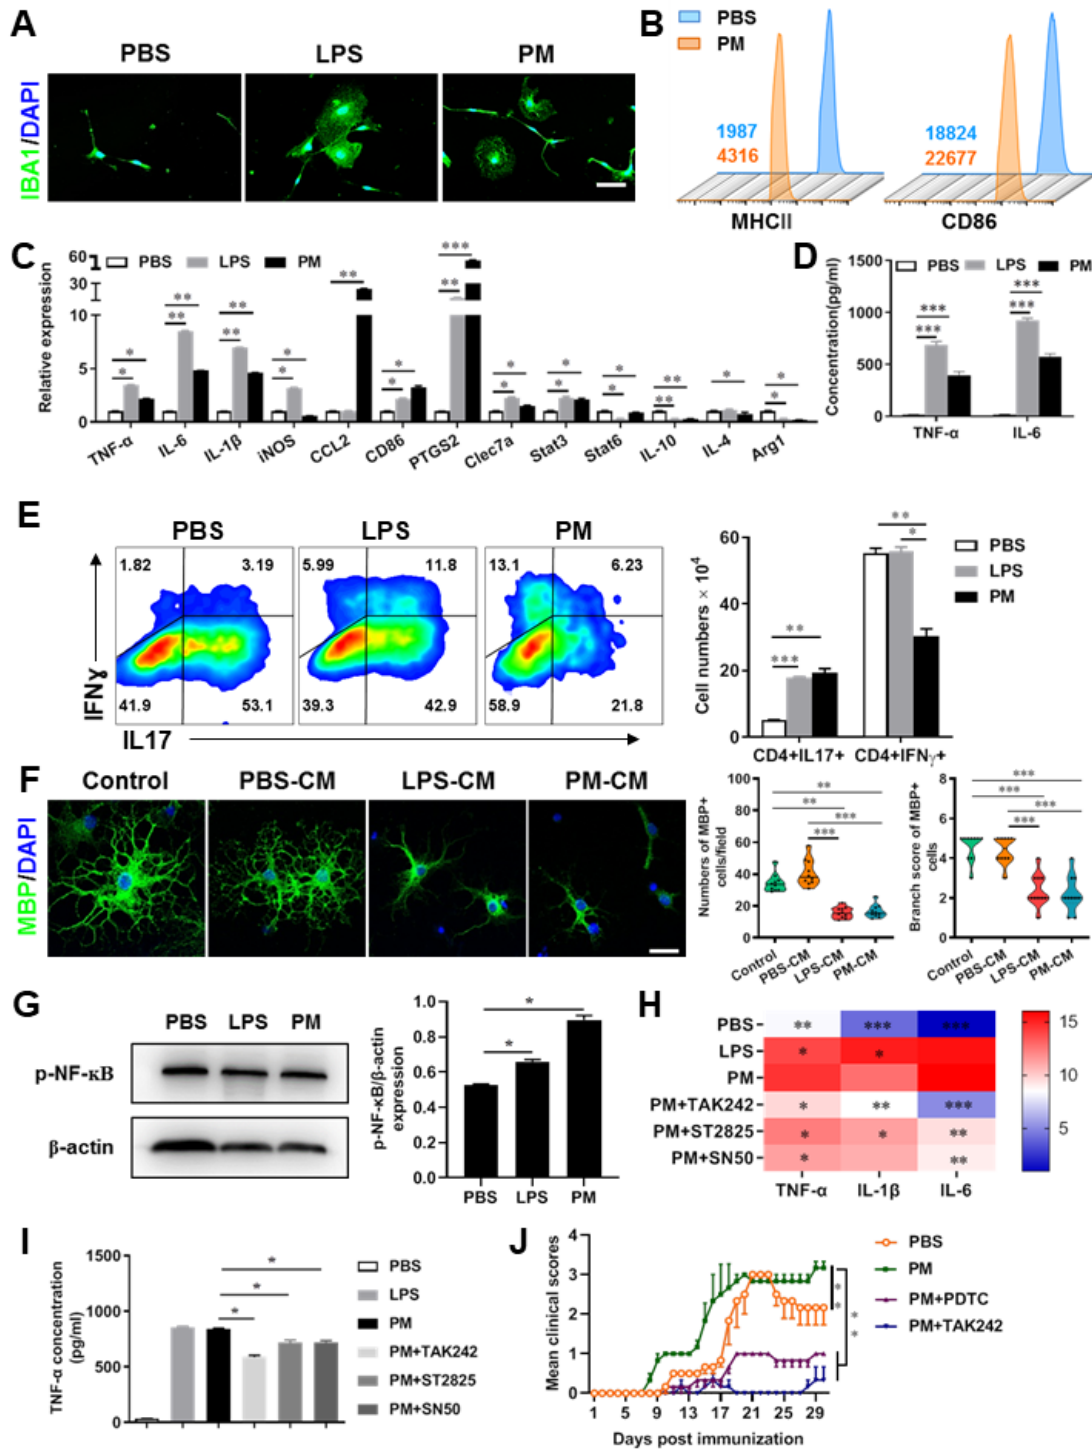

953

954 **Figure 4. PM exposure boosts microglial activation and pathogenicity. (A)**

955 Morphology of microglia under the treatment of PM or LPS. Primary microglia from

956 newborn C57BL/6 mice was stimulated for 6 h with PBS, LPS (100 ng/mL) or PM

957 (100  $\mu$ g/mL). Microglia/macrophages were labeled with IBA1 (green) and nuclei

958 stained with DAPI (blue). **(B)** Effects of PM treatment on the expression of MHC II,  
959 CD86, and CD80 of microglia. Primary microglia were stimulated with LPS or PM  
960 for 24 h, and analyzed by flow cytometry. **(C)** mRNA relative expression of cytokines  
961 and cell surface markers of LPS- or PM-treated microglia was detected by real-time  
962 PCR. **(D)** ELISA analysis for production of pro-inflammatory cytokine TNF- $\alpha$  and  
963 IL-6 in culture medium under PM treatment. **(E)** Responses of primary OPCs to  
964 application of microglia-conditioned media (MCM) *in vitro*. OPCs (5,000 cells/cm<sup>2</sup>)  
965 were cultured in differentiation medium for 3 days, and half of medium was replaced  
966 by culture supernatants of microglia treated with PBS (PBS-MCM), LPS (LPS-MCM)  
967 or PM (PM-MCM) for another 4 days. Mature oligodendrocytes were identified by  
968 specific markers MBP (green). Quantitative analysis of numbers or branch score of  
969 MBP+ mature oligodendrocytes was assessed by using Image-Pro. **(F)** Naïve CD4+  
970 cells were cocultured with LPS- or PM-activated microglia under Th17-polarizing  
971 conditions. The percentages of Th17 and Th1 cells in the CD4 subset were analyzed  
972 by intracellular staining of IL-17 and IFN- $\gamma$ , respectively. **(G)** Immunoblot analysis of  
973 the phosphorylation of NF- $\kappa$ B (p-NF- $\kappa$ B). **(H)** mRNA relative expression of  
974 pro-inflammatory cytokines (TNF- $\alpha$ , IL-6, and IL-1 $\beta$ ) of LPS- or PM-stimulated  
975 microglia pre-treated with TAK242 (1  $\mu$ g/mL), ST2825 (10  $\mu$ M), or SN50 (10  $\mu$ M)  
976 for 4 h. **(I)** ELISA analysis for production of TNF- $\alpha$  in LPS- or PM--stimulated  
977 microglia pre-treated with TAK242 (1  $\mu$ g/mL), ST2825 (10  $\mu$ M), and SN50 (10  $\mu$ M)  
978 for 4 h. **(J)** EAE development was evaluated daily for PM- or PBS-treated group with  
979 or without TAK242 and PDTC administration by two researchers blindly, according to

980 a 0-5 scale. Female, 8-10 week-old C57BL/6 mice were immunized with MOG<sub>35-55</sub>  
981 and pre-treated with PBS or PM (nasopharyngeal inhalation, 5.0 mg/kg/d) daily,  
982 starting at day -30 (before immunization) until the end of the experiment. TAK242  
983 (5.0 mg/kg/d) or PDTC (10.0 mg/kg/d) was given by intraperitoneal injection at day 0  
984 p.i. Data were collected from 3-5 mice each group. Symbols represent mean  $\pm$  SD;  
985 \* $p$  < 0.05; \*\* $p$  < 0.01; \*\*\* $p$  < 0.001; two-way ANOVA comparison with Tukey's  
986 multiple comparisons test. Scale bar = 100  $\mu$ m in A, Scale bar = 50  $\mu$ m in E.  
987

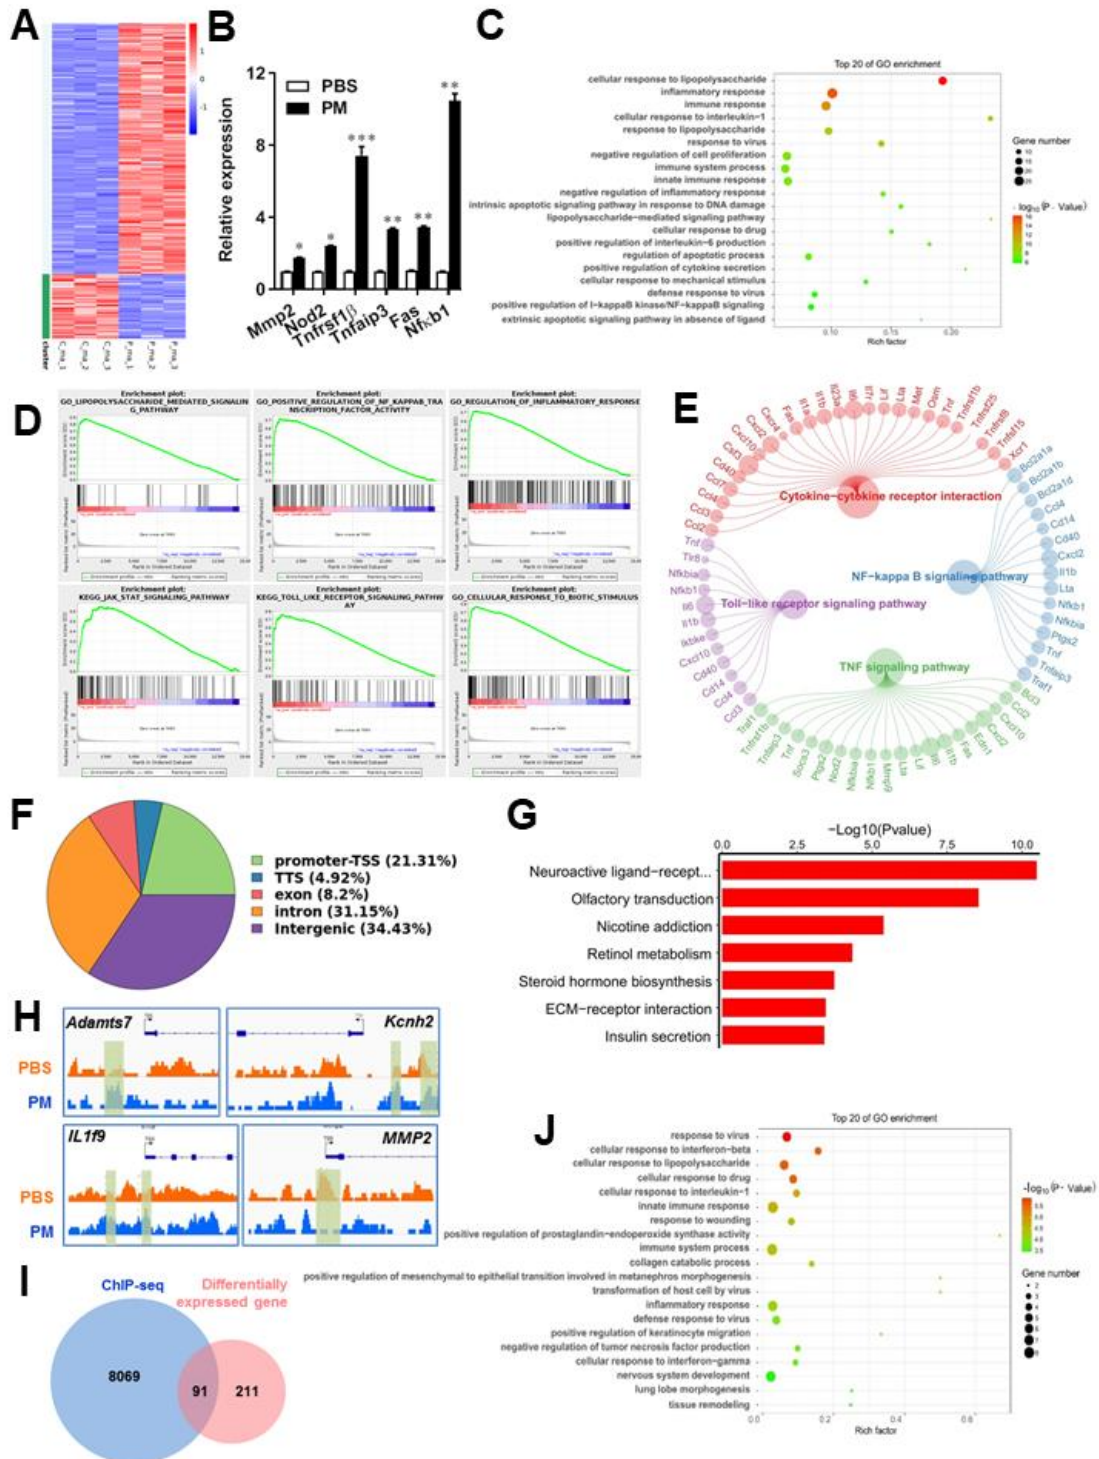

988

989 **Figure 5. PM-induced genomic regulation microglia activities by TLR-4/NF-κB**  
 990 **signaling.** (A) Heatmap displaying the fold changes of genes (rows) in the PM  
 991 perturbations (columns). Displayed are only genes that were differentially expressed  
 992 (fold change > 2; false discovery rate [FDR] < 0.001) in at least one condition. (B)



993 Real-time qPCR analysis of PM-regulated genes in PM and PBS-treated microglia (*n*  
994 = 3). **(C)** The Gene Ontology (GO) analysis of the significantly regulated genes  
995 between PM and PBS-treated group. **(D and E)** Gene set enrichment analysis (D) and  
996 pathway analysis (E) of PM and PBS-treated microglia RNA-seq. **(F)** Fractions of  
997 ChIP-seq peaks in different regions of the genome. **(G)** GO of NF- $\kappa$ B-targeted genes.  
998 **(H)** ChIP-seq showing NF- $\kappa$ B binding at selected gene loci (*Asamts7*, *Kcnh2*, *IL1f9*,  
999 and *MMP2*). **(I)** Venn diagram showing the overlap between NF- $\kappa$ B-bound genes and  
1000 differentially expressed genes in PM and PBS-treated microglia. **(J)** GO functional  
1001 categories analysis of NF- $\kappa$ B directly targeted genes.

1002

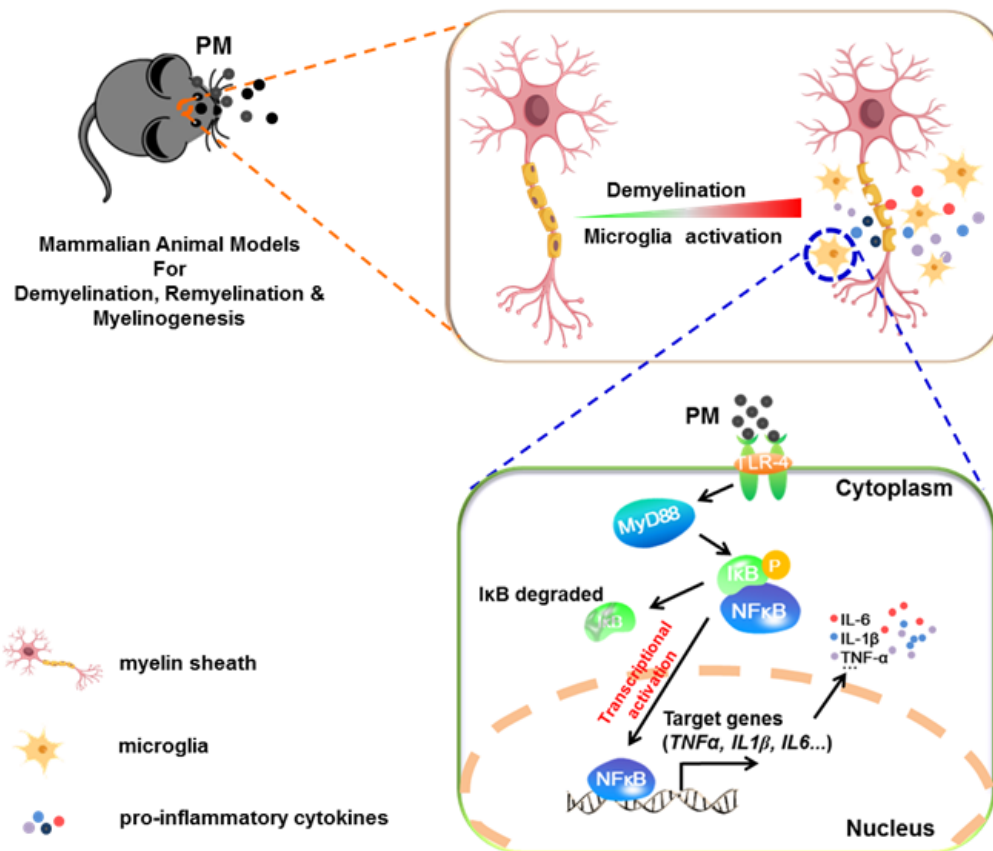

1003

1004 **Figure 6. Model of PM aggravates CNS demyelination via**  
1005 **TLR-4/NF-κB-mediated microglia pathogenic activities.** PM exposure definitely  
1006 exacerbates CNS myelin injury, based on three complementary animal models: the  
1007 immune-induced EAE model, the toxicity-induced de/remyelination model that under

1008 minimal or non-inflammatory microenvironments, and the myelinogenesis model  
1009 during postnatal development. The cellular basis of this action is associated with the  
1010 activation of microglial pro-inflammatory activities. Mechanistically, TLR-4/NF- $\kappa$ B  
1011 signaling mediated a core network of genes that control PM-triggered microglia  
1012 pathogenicity. Activated microglia, the resident CNS immune cells, respond to PM  
1013 perturbation directly, release pro-inflammatory factors, and subsequently aggravate  
1014 neuroinflammation, myelin injury, and dysfunction of movement coordination ability  
1015 of mice.

1016

#### 1017 **Supplementary figure legend**

1018 **Figure S1. Effects of PM exposure on different immune cells in periphery.** Splenocytes of  
1019 EAE mice pre-treated with PBS or PM (nasopharyngeal inhalation, 5.0 mg/kg/d) daily  
1020 described in (Figure 1) were harvested at day 30 p.i. Cells were stimulated with MOG<sub>35-55</sub> (25  
1021  $\mu$ g/ml) for 72 h, and analyzed by flow cytometry. Quantitative data refer to mean  $\pm$  SD  
1022 (n=3-5 in Fig. 1). \* $p$  < 0.05; \*\* $p$  < 0.01; \*\*\* $p$  < 0.001, compared to PBS-treated group,  
1023 Tukey's multiple comparisons test. One representative of 3 independent experiments is  
1024 shown.

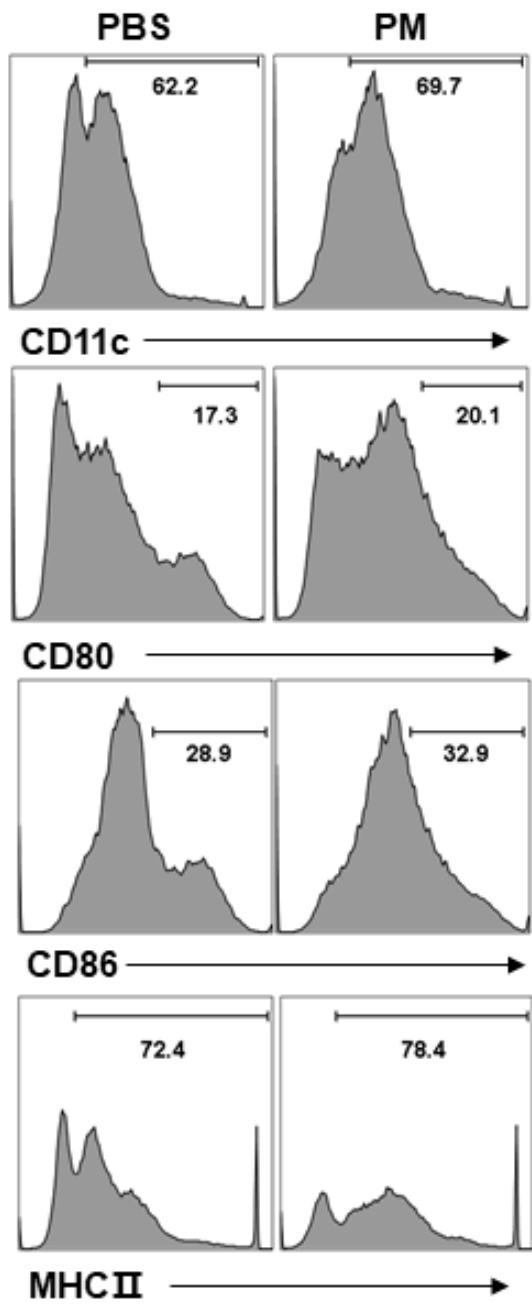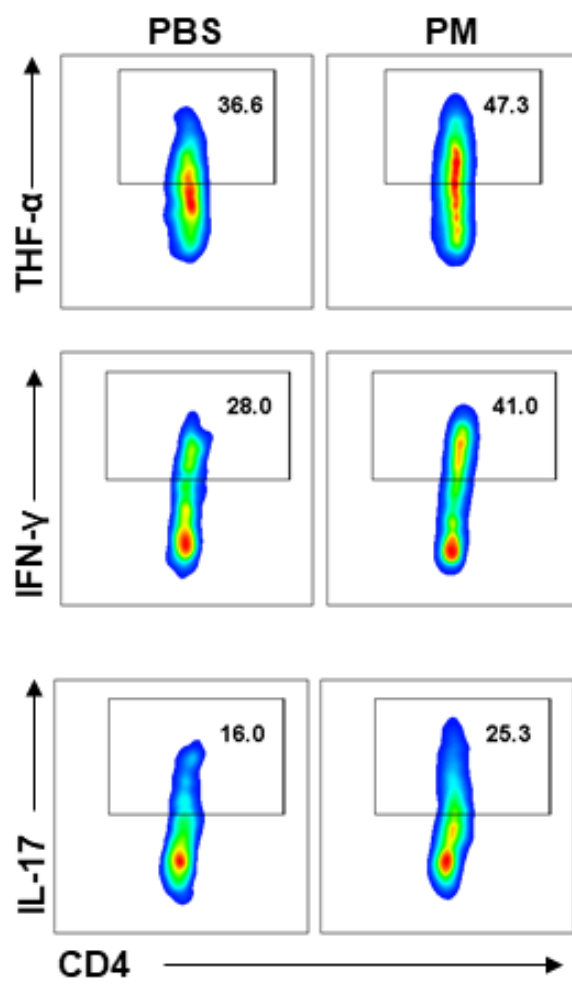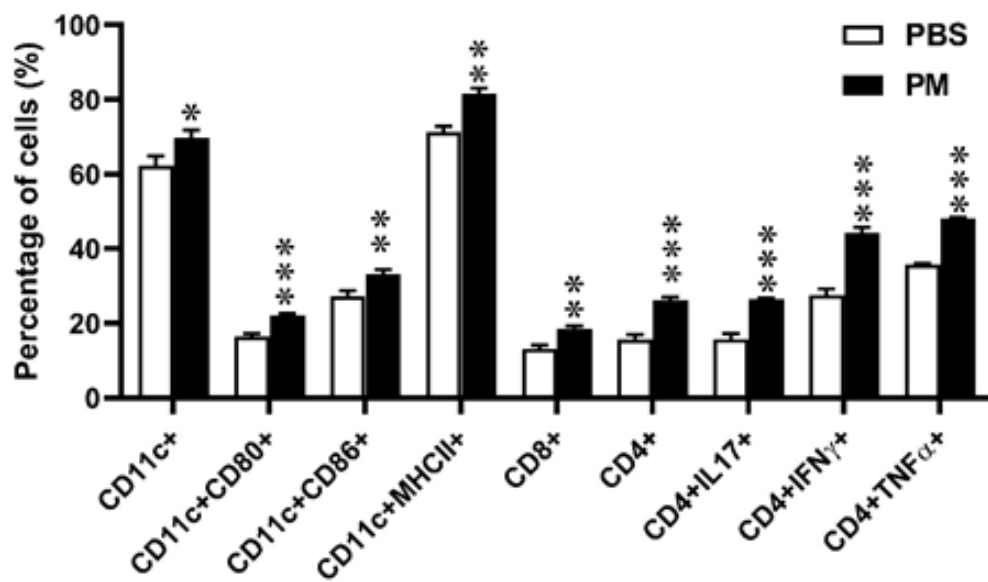

Source: http://biorxiv.org/content/10.1101/2021.08.09.455666v1.full.pdf
